# Supplementary material for: Synthesis of 1,2,3-triazole-piperazin-benzo[ b ][1,4]thiazine 1,1-dioxides: antibacterial, hemolytic and in silico TLR4 protein inhibitory activities
Source: Royal Society of Chemistry journal article supplement (doi:10.1039/d3ra07509e), 2024-01-01
Supplement: d3ra07509e1.pdf [file d3ra07509e1.pdf]

## Supporting information

---

### **Synthesis of 1,2,3-triazole-piperazin-benzo[*b*][1,4]thiazine 1,1-dioxides: Antibacterial, Hemolytic and *In silico* TLR4 protein inhibitory activities**

Nagavelli Ramu,<sup>a</sup> Thupurani Murali Krishna,<sup>b</sup> Ravikumar Kapavarapu,<sup>c</sup> Sirassu Narsimha\*<sup>a</sup>

<sup>a</sup>*Department of Chemistry, Chaitanya Deemed to be University, Hyderabad, Telangana, India*

<sup>b</sup>*Department of Biotechnology, Chaitanya Deemed to be University, Hyderabad, Telangana, India*

<sup>c</sup>*Department of Pharmaceutical Chemistry and Phytochemistry, Nirmala College of Pharmacy, Atmakur,  
Mangalgiri, Andhra Pradesh, India*

\*E-mail: [narsimha.s88@gmail.com](mailto:narsimha.s88@gmail.com) & [narsimha.s88@chaitanya.edu.in](mailto:narsimha.s88@chaitanya.edu.in)

## Content

|                                                              |
|--------------------------------------------------------------|
| <b>Docking figures</b>                                       |
| <b>Copies of <sup>1</sup>H-NMR, <sup>13</sup>C-NMR, Mass</b> |





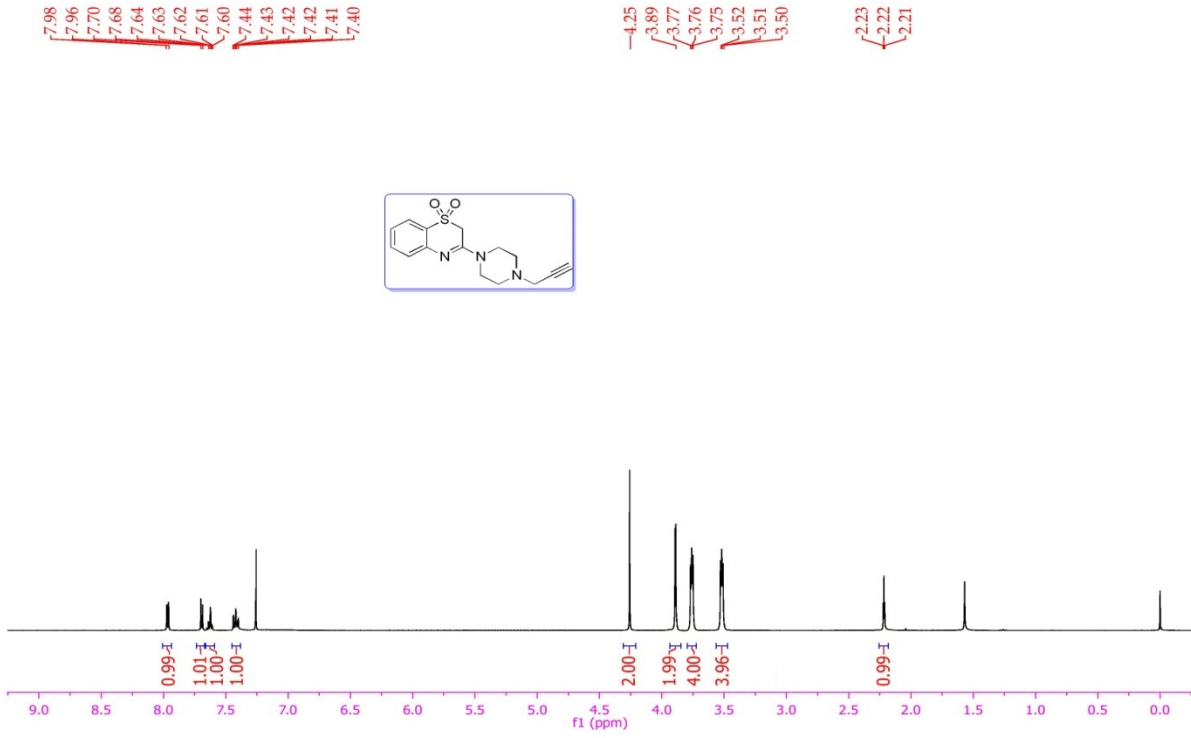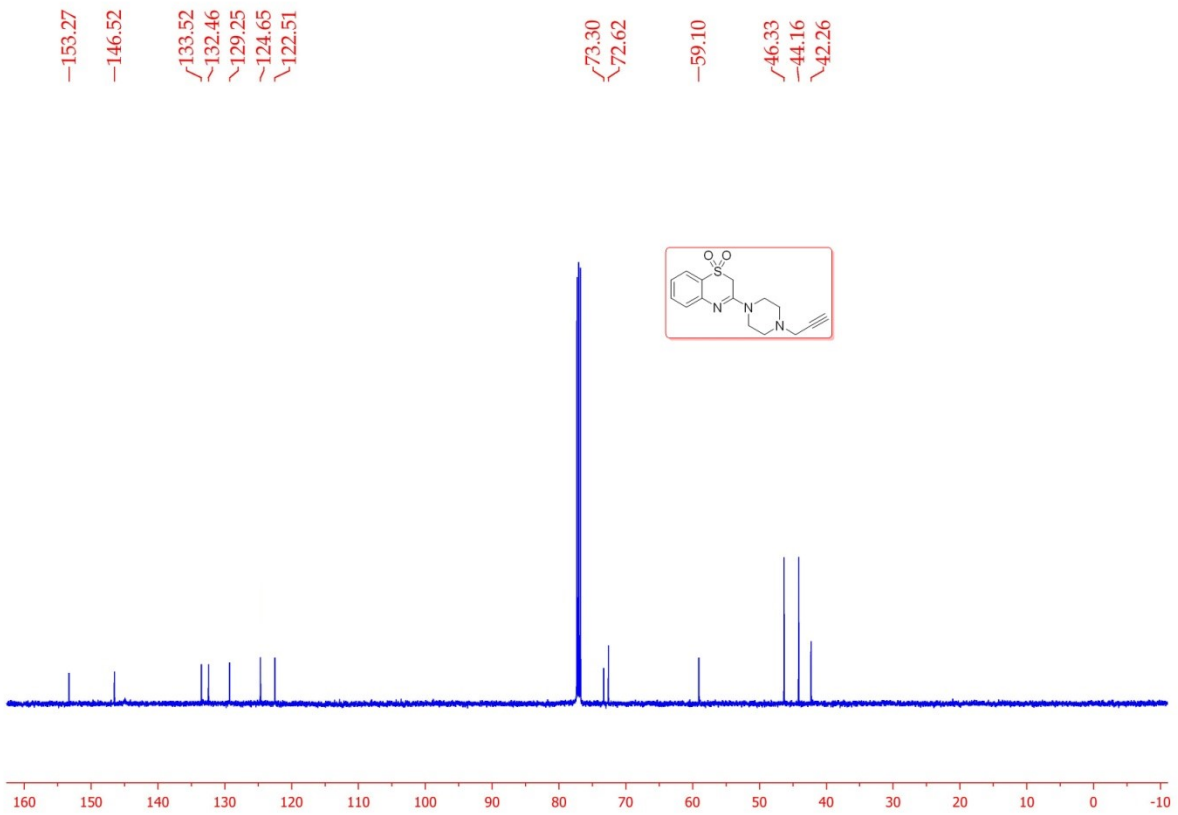

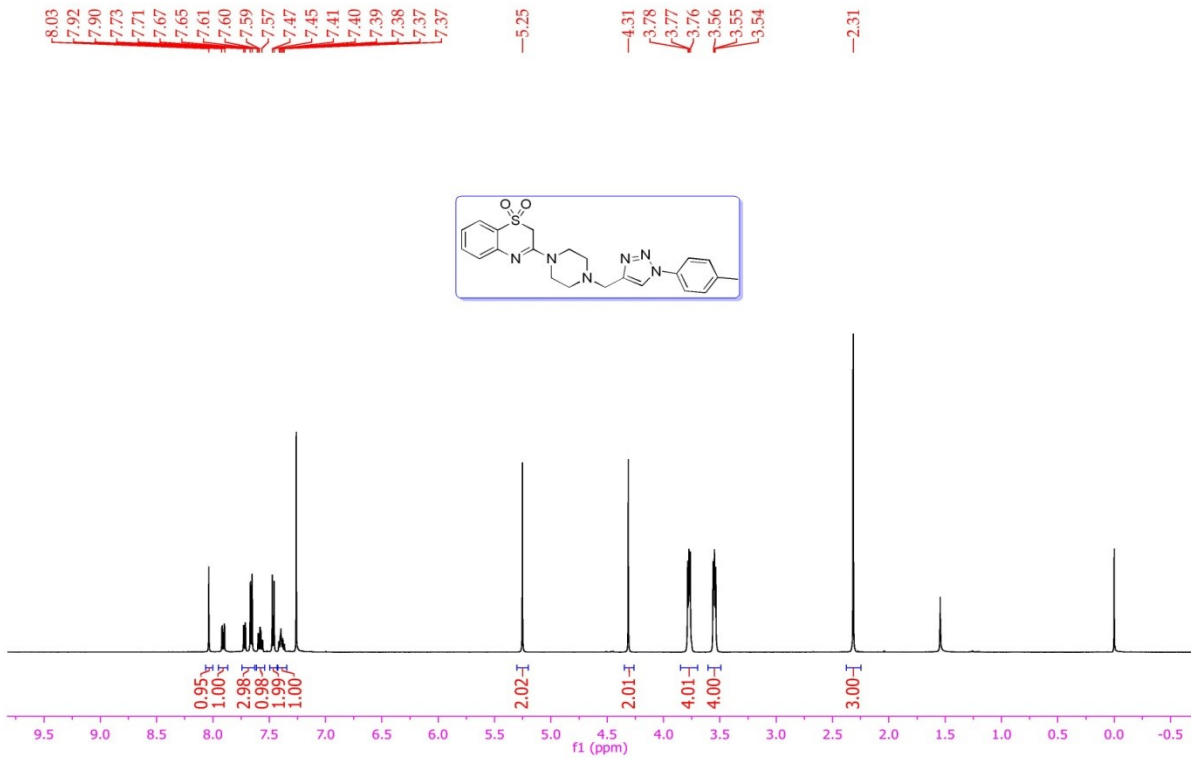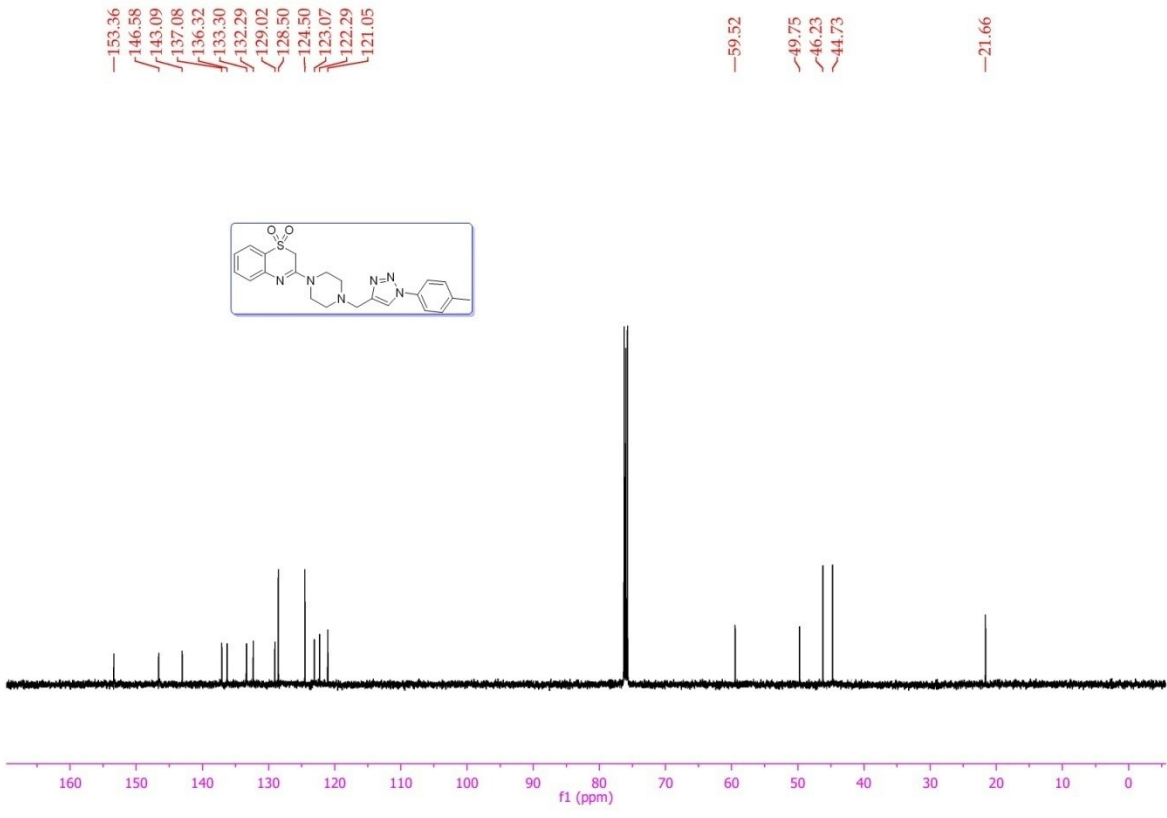

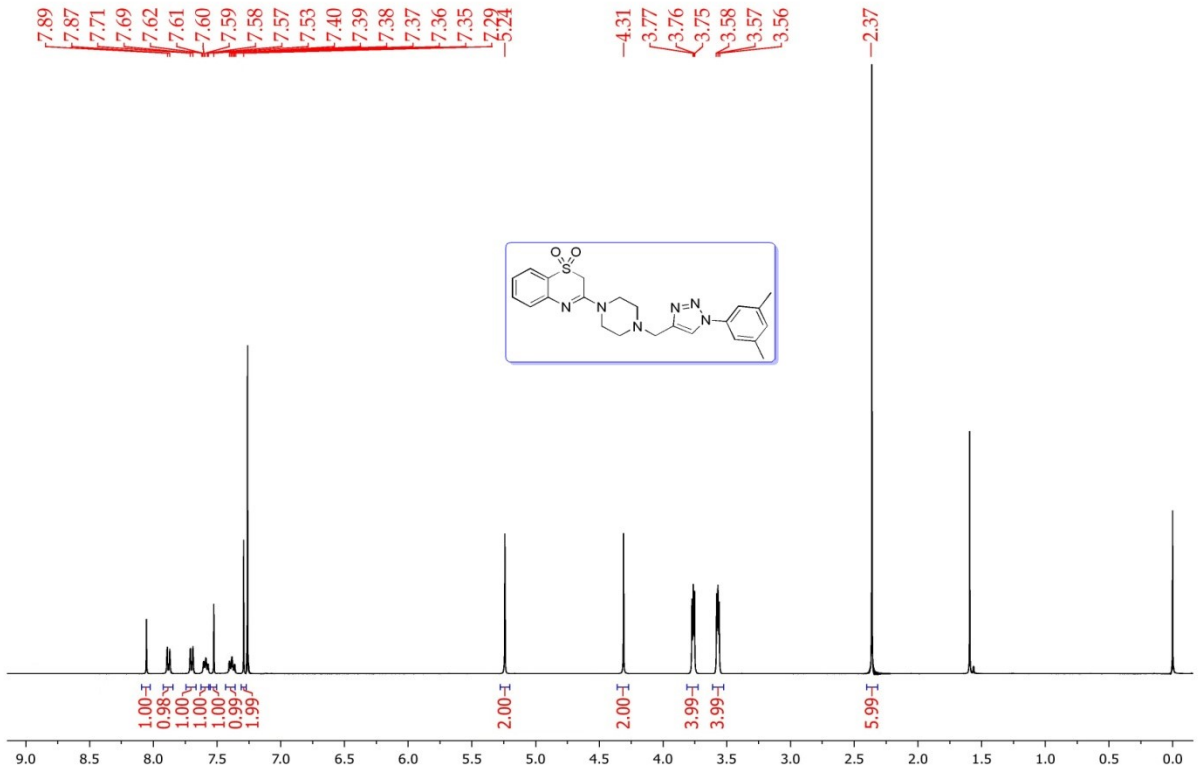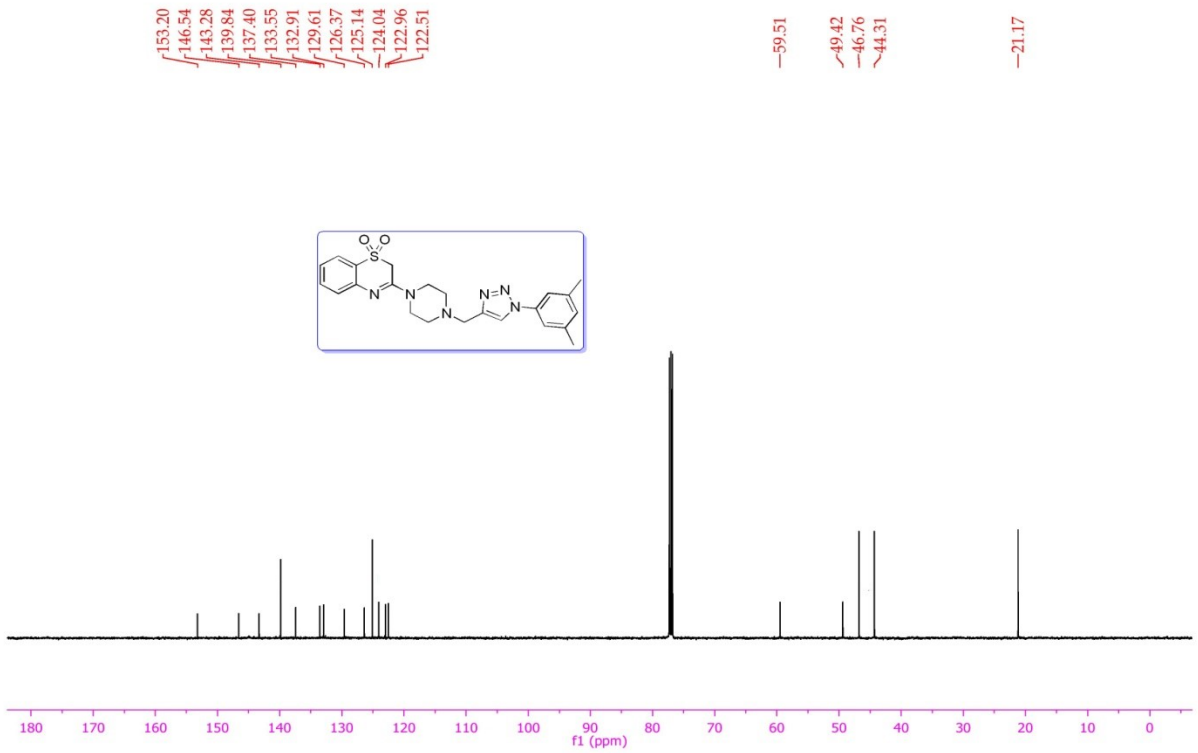

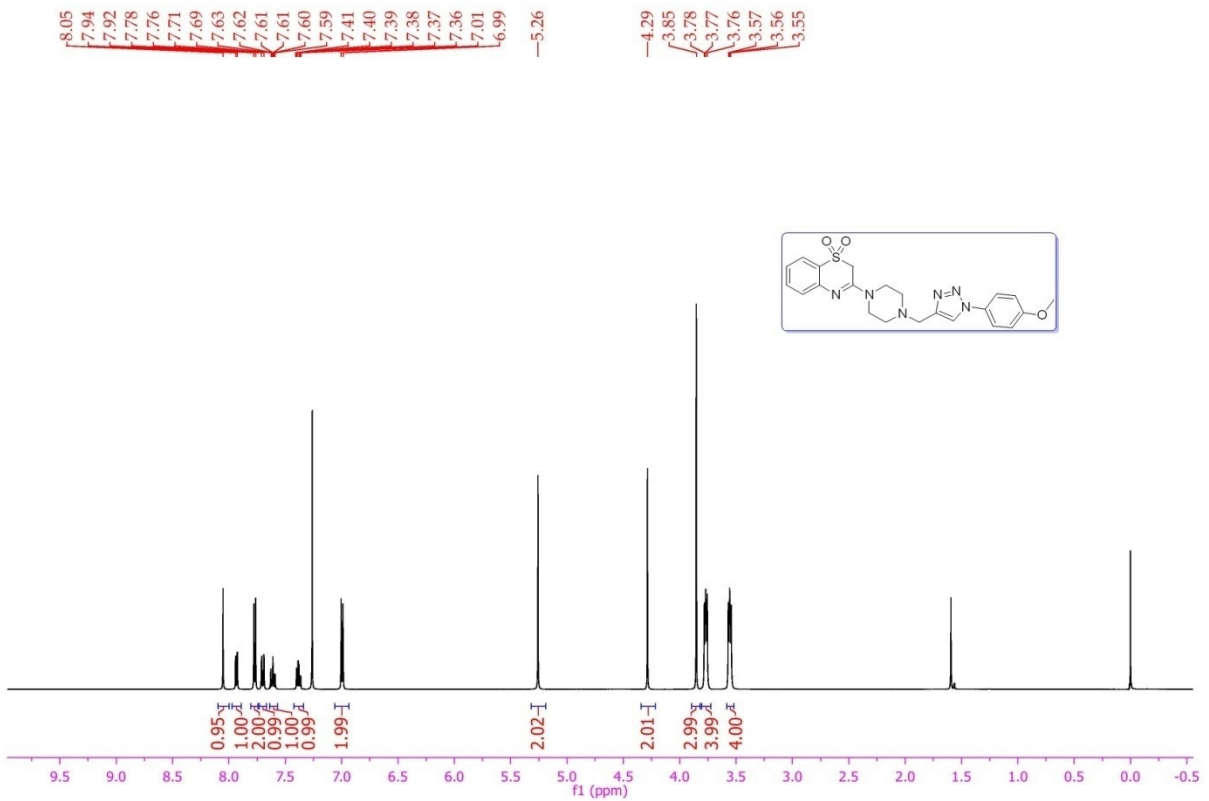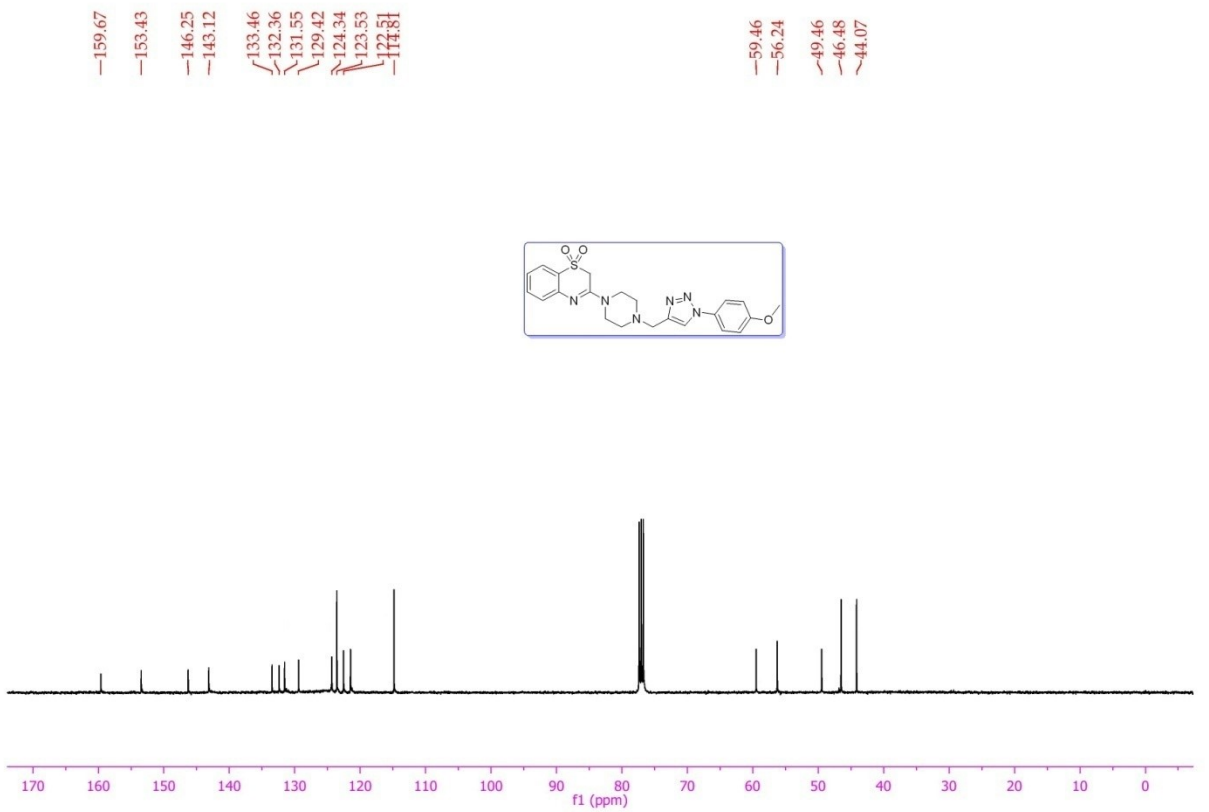

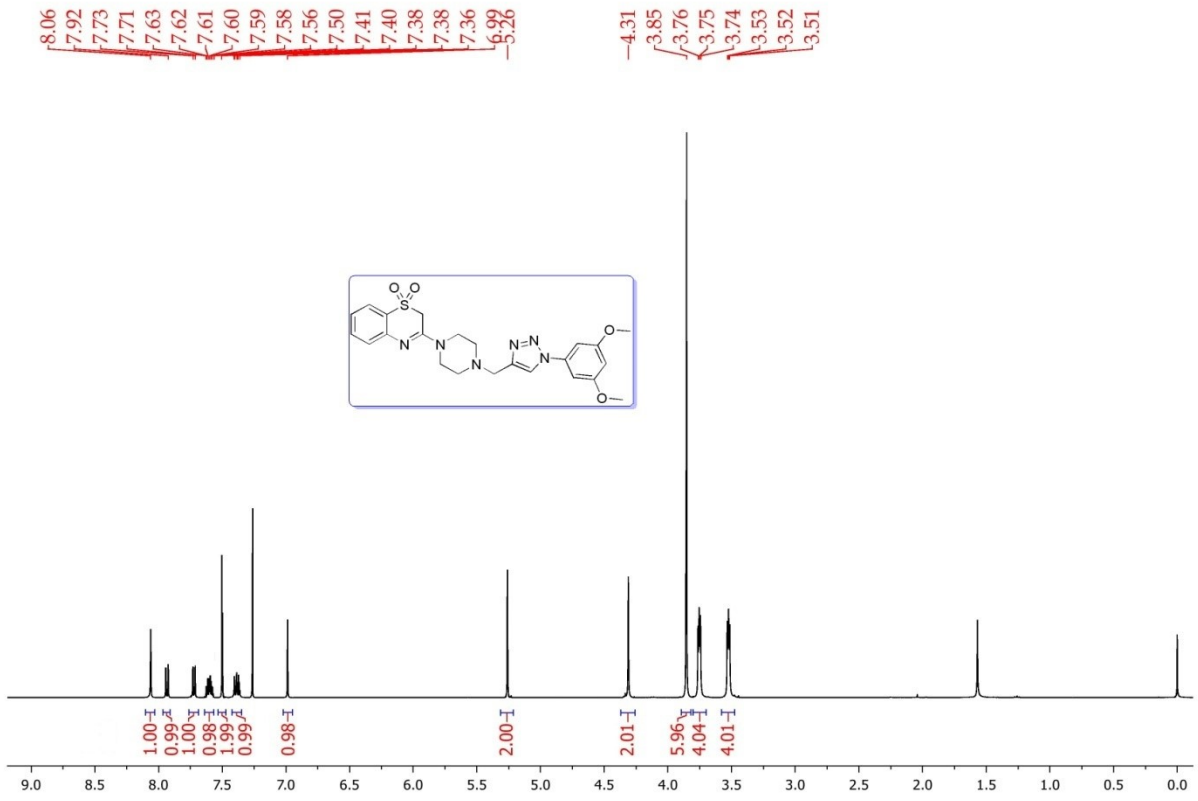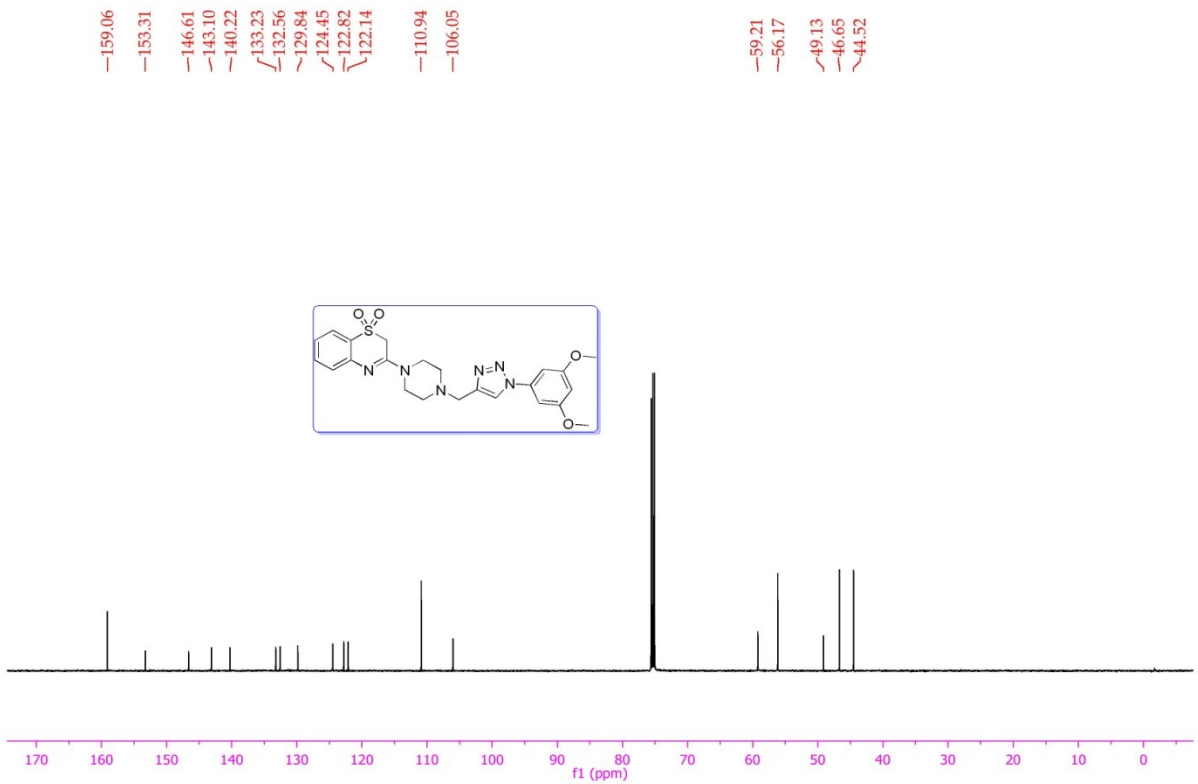



159.12  
153.26  
146.30  
143.02  
138.39  
133.50  
132.03  
129.53  
124.87  
122.87  
122.18  
118.02  
112.45

59.47  
56.49  
49.15  
46.58  
44.36

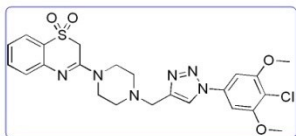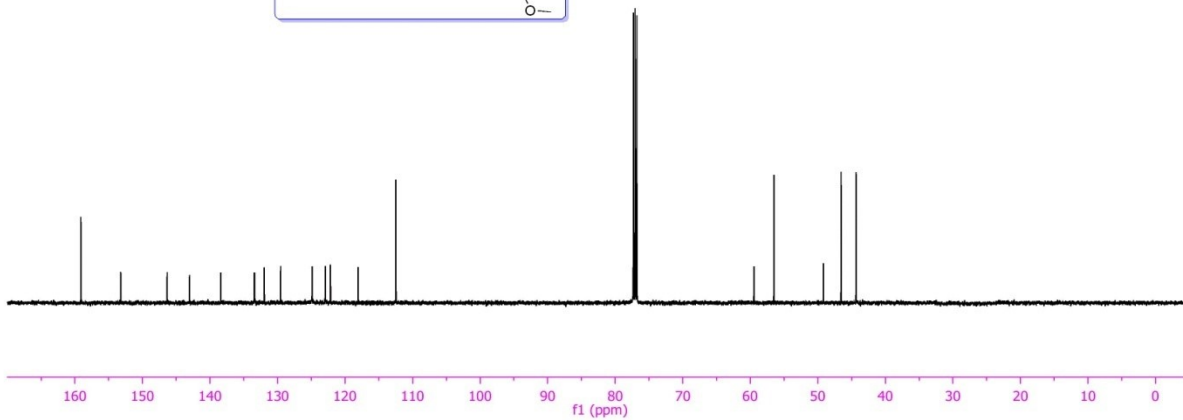

159.12  
153.26  
146.30  
143.02  
138.39  
133.50  
132.03  
129.53  
124.87  
122.87  
122.18  
118.02  
112.45

59.47  
56.49  
49.15  
46.58  
44.36

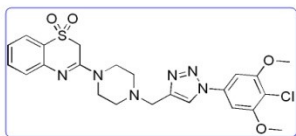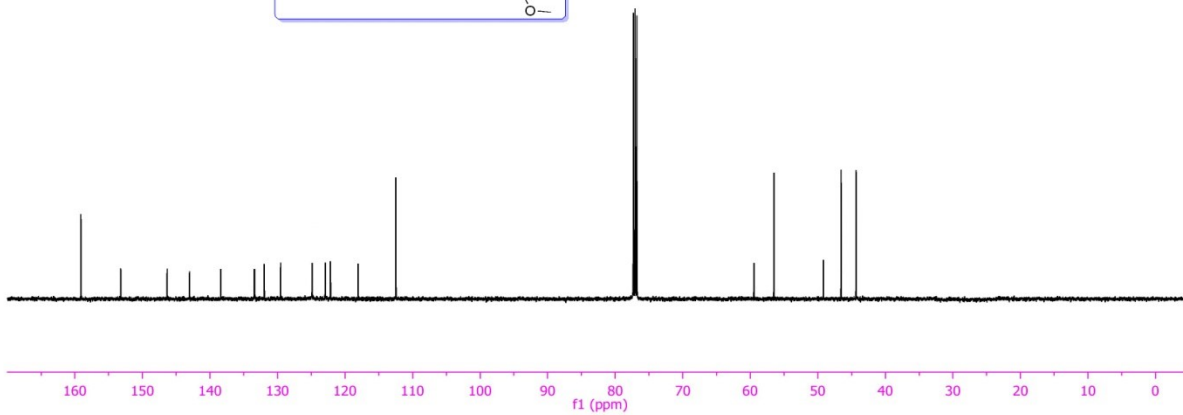

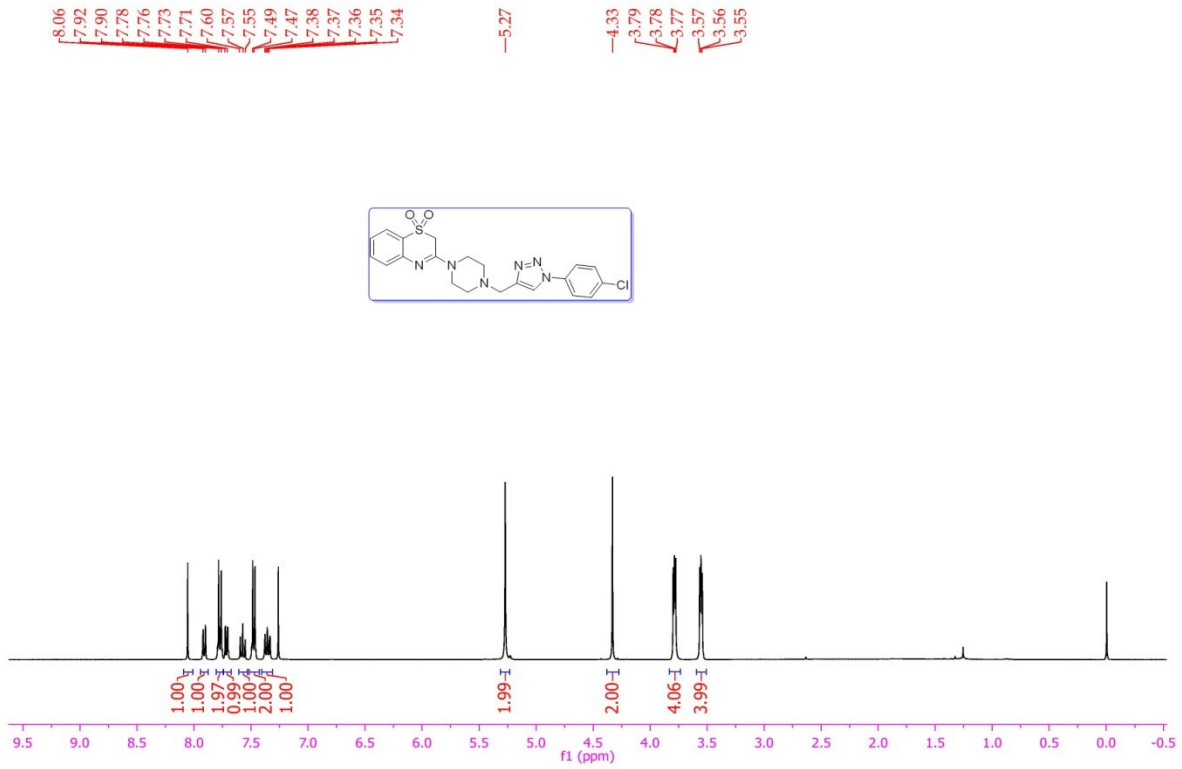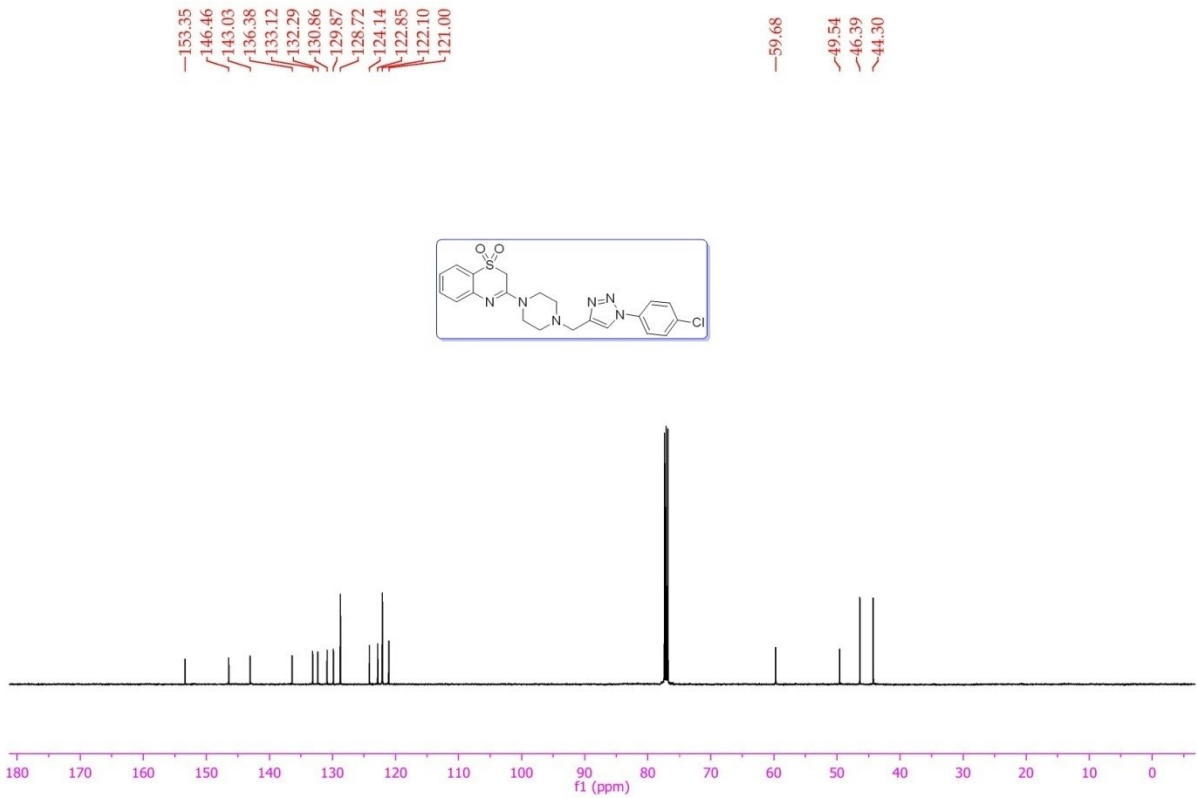

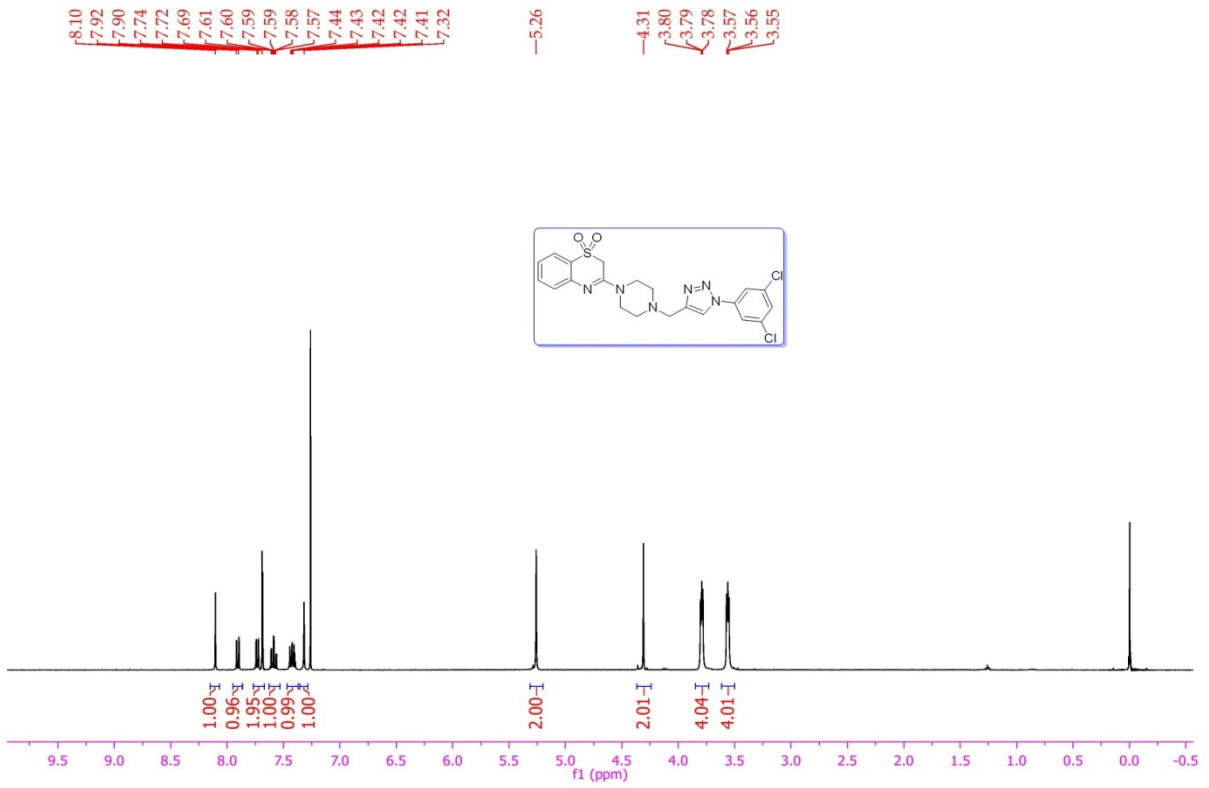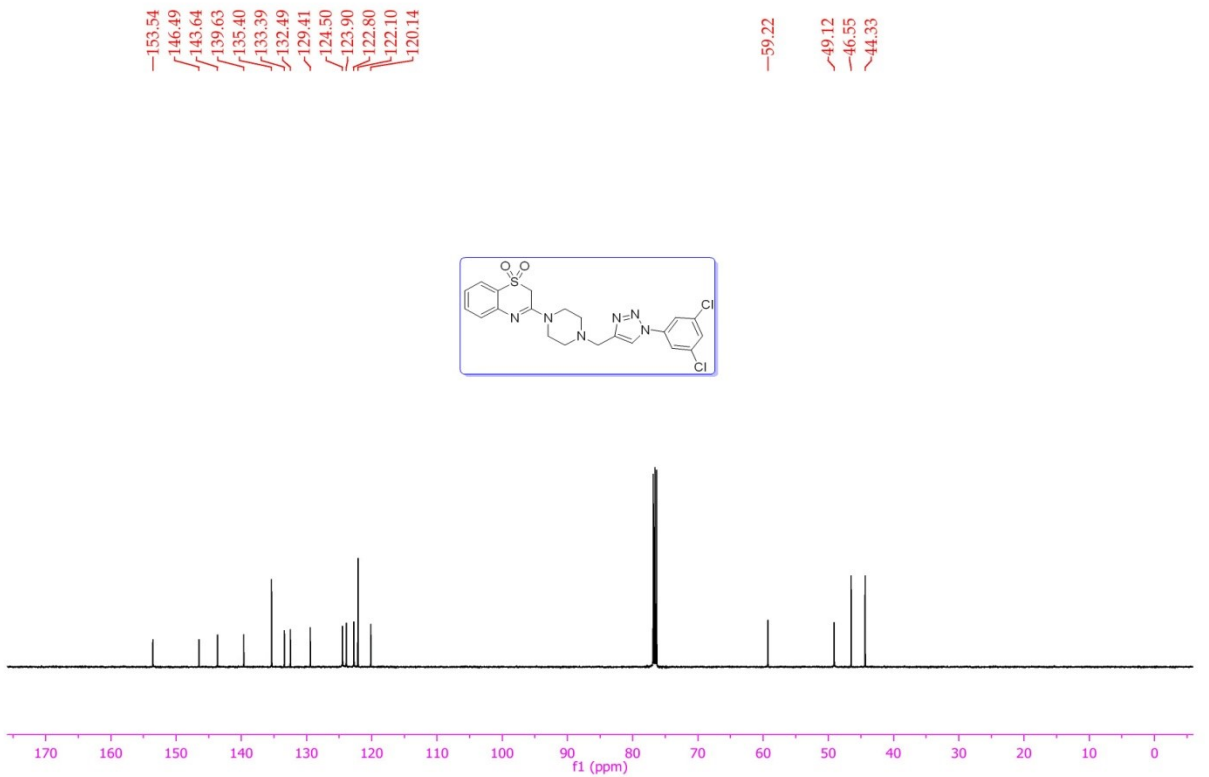

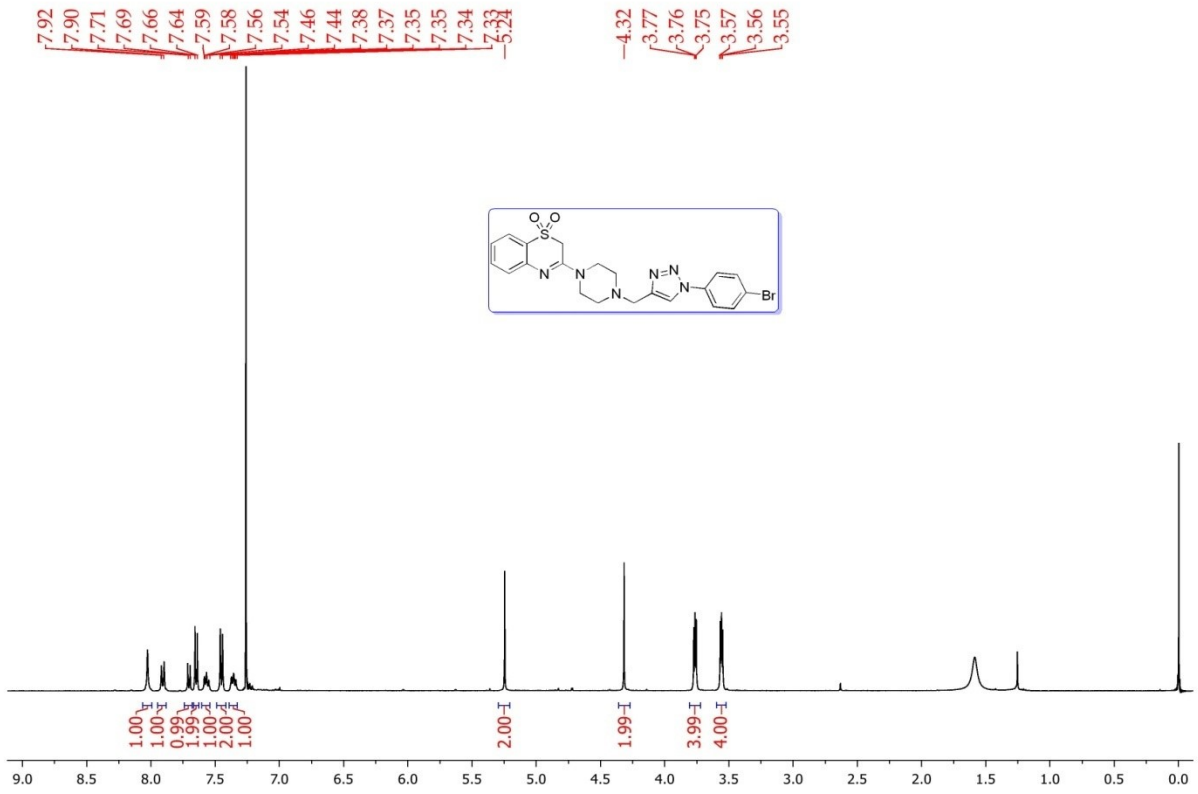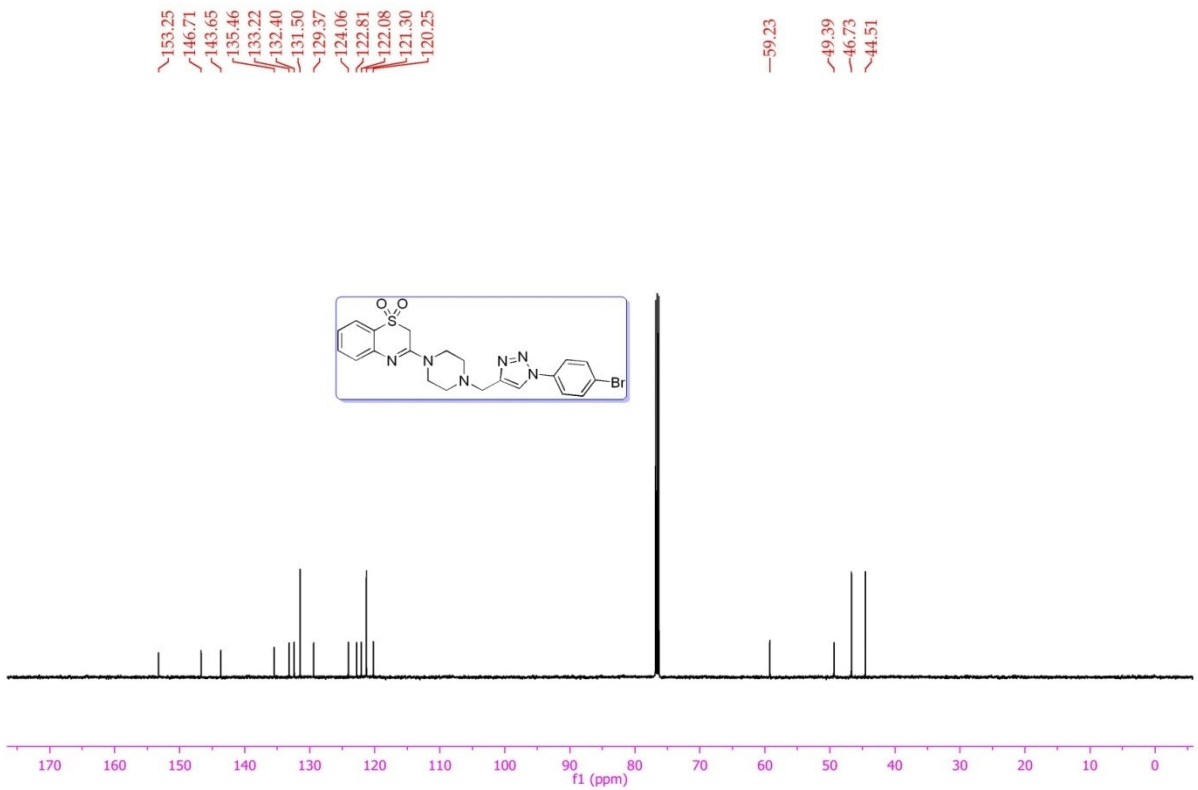

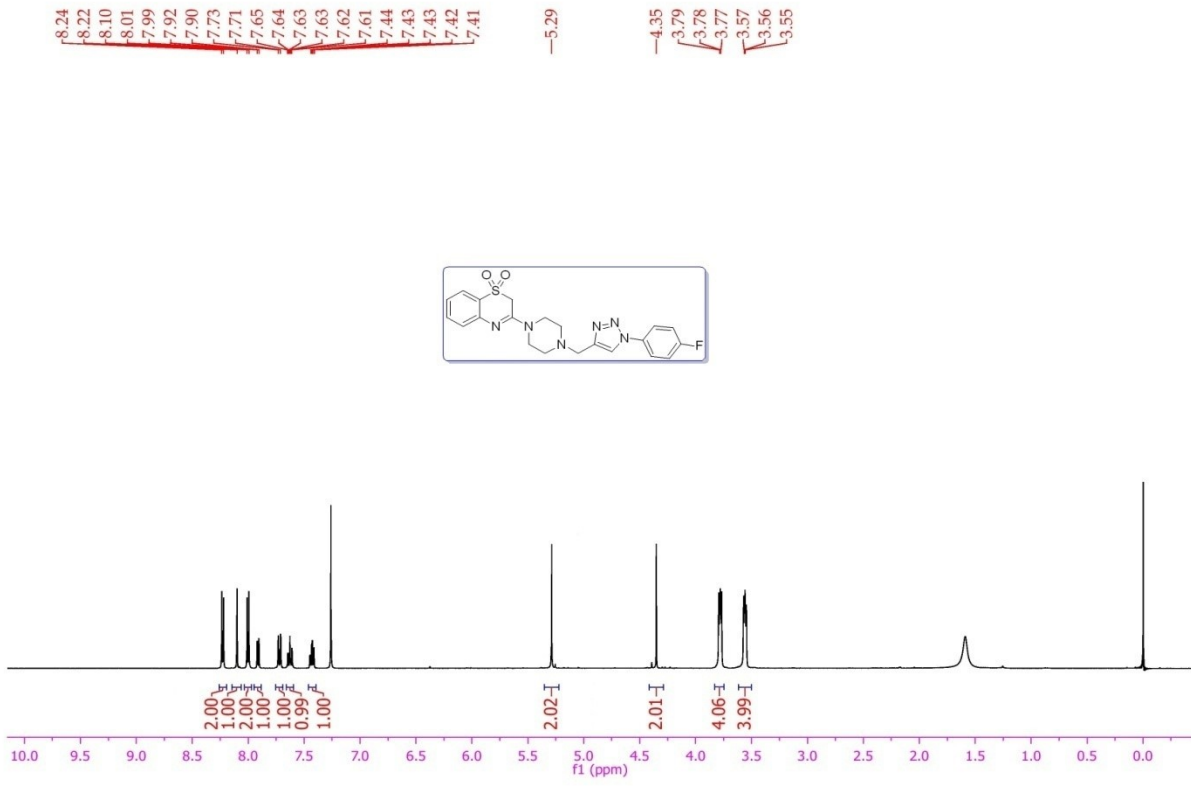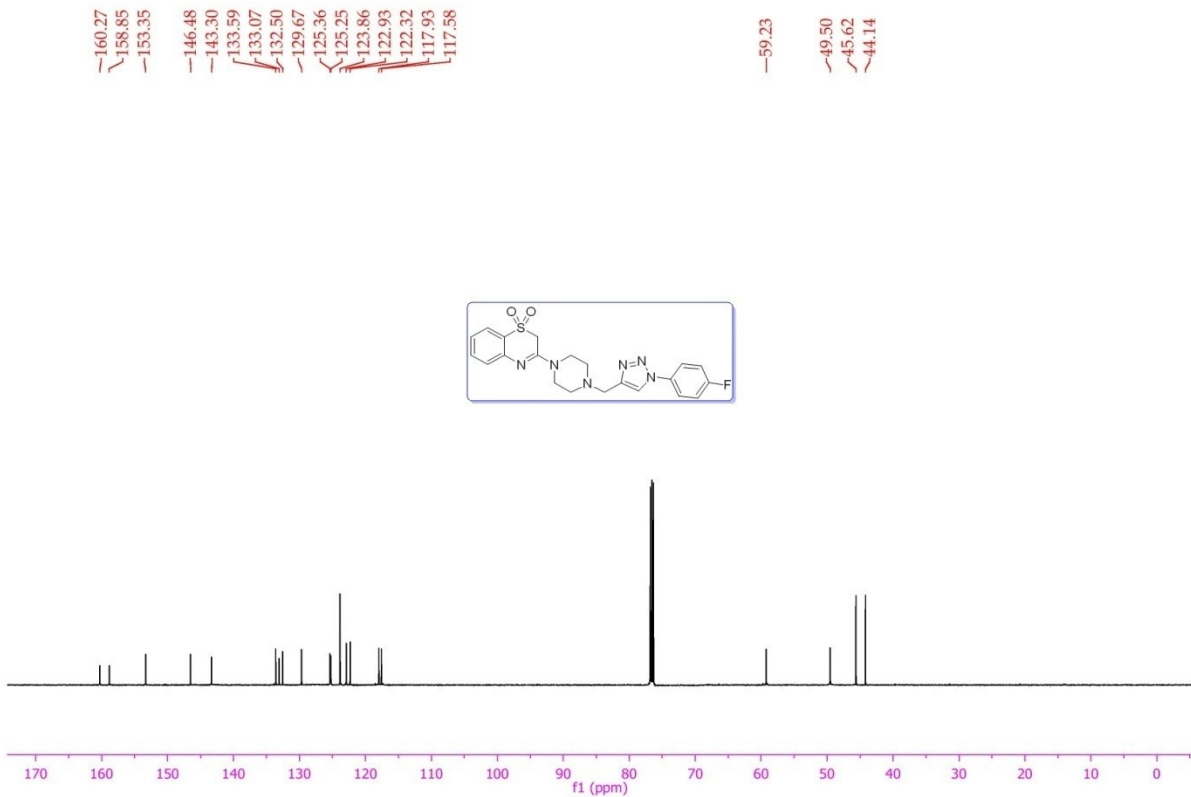

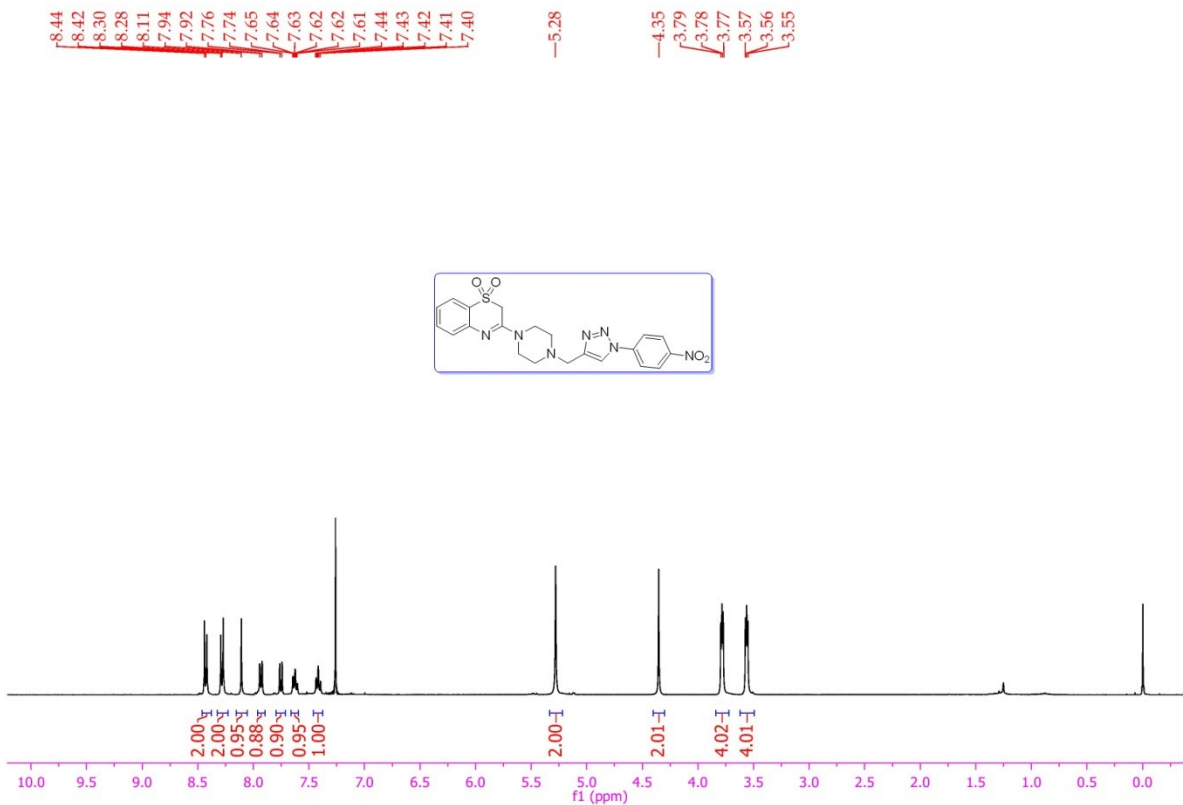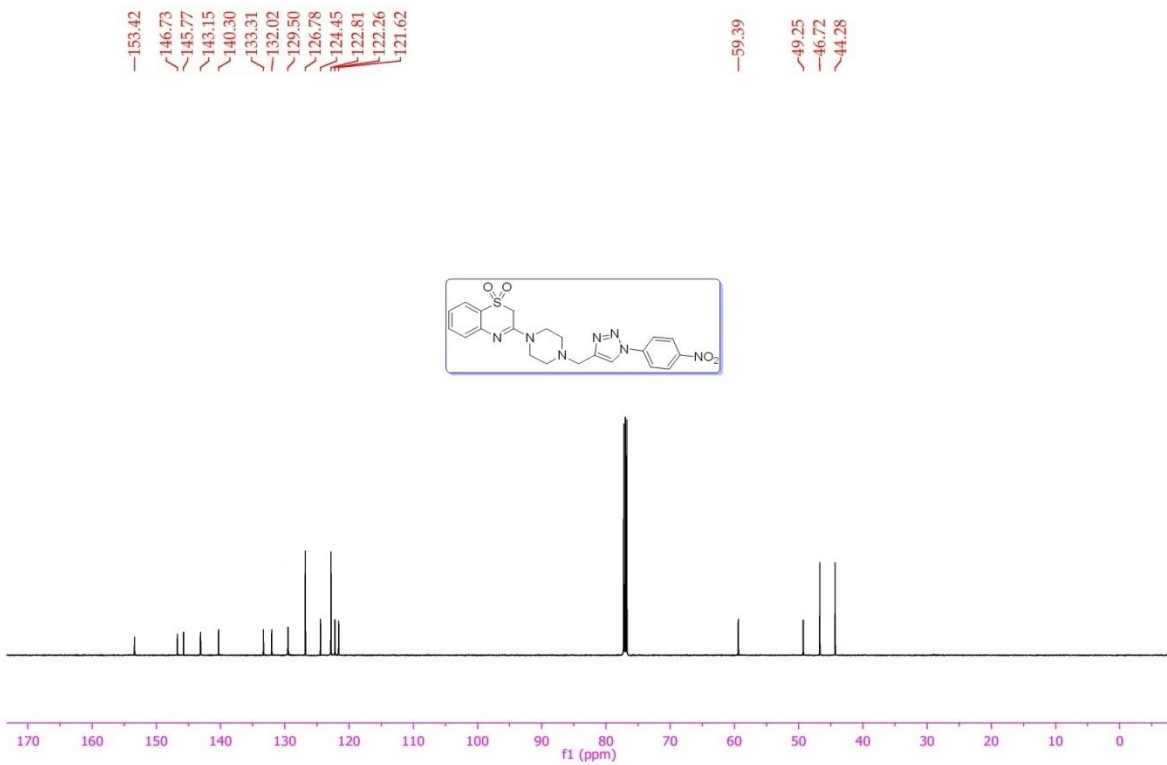

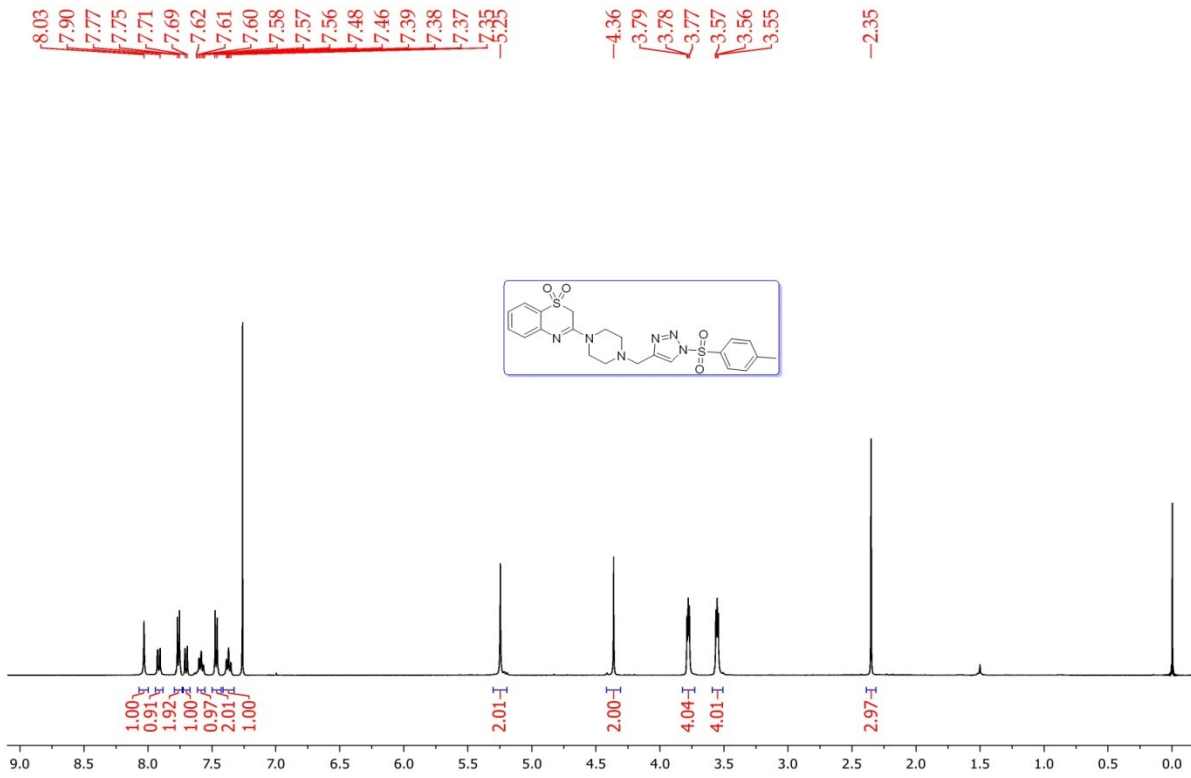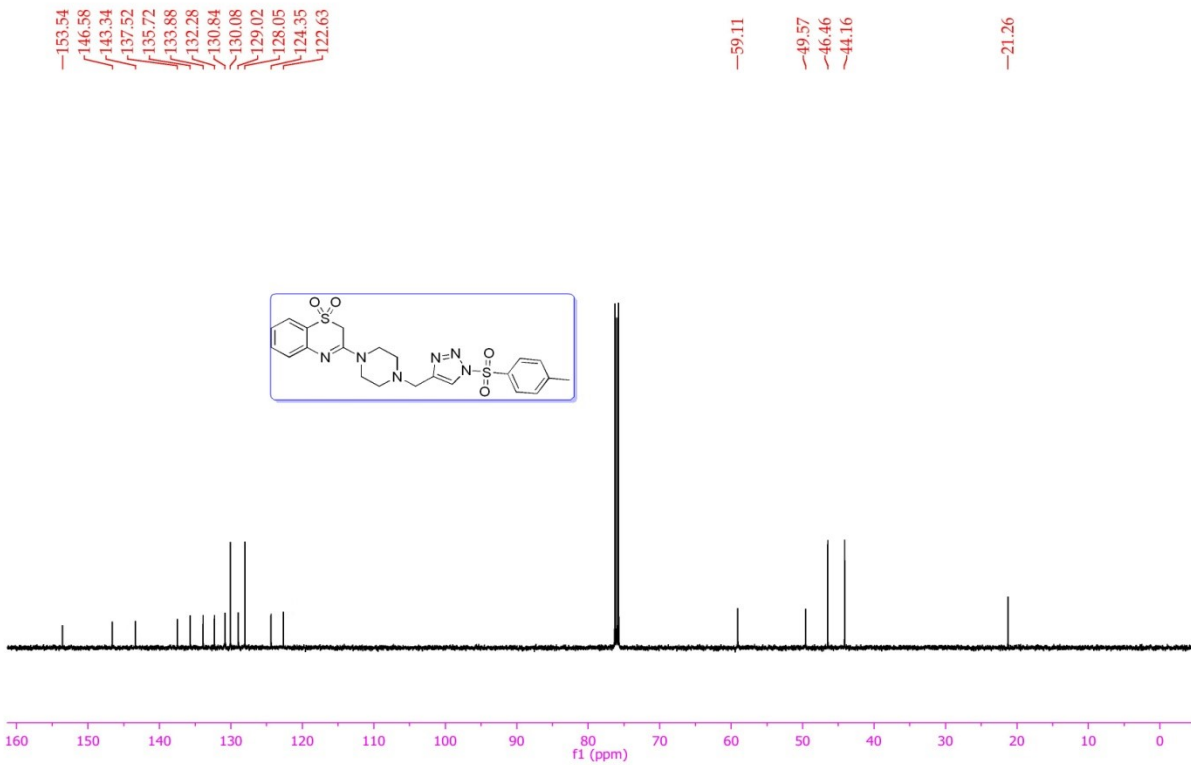

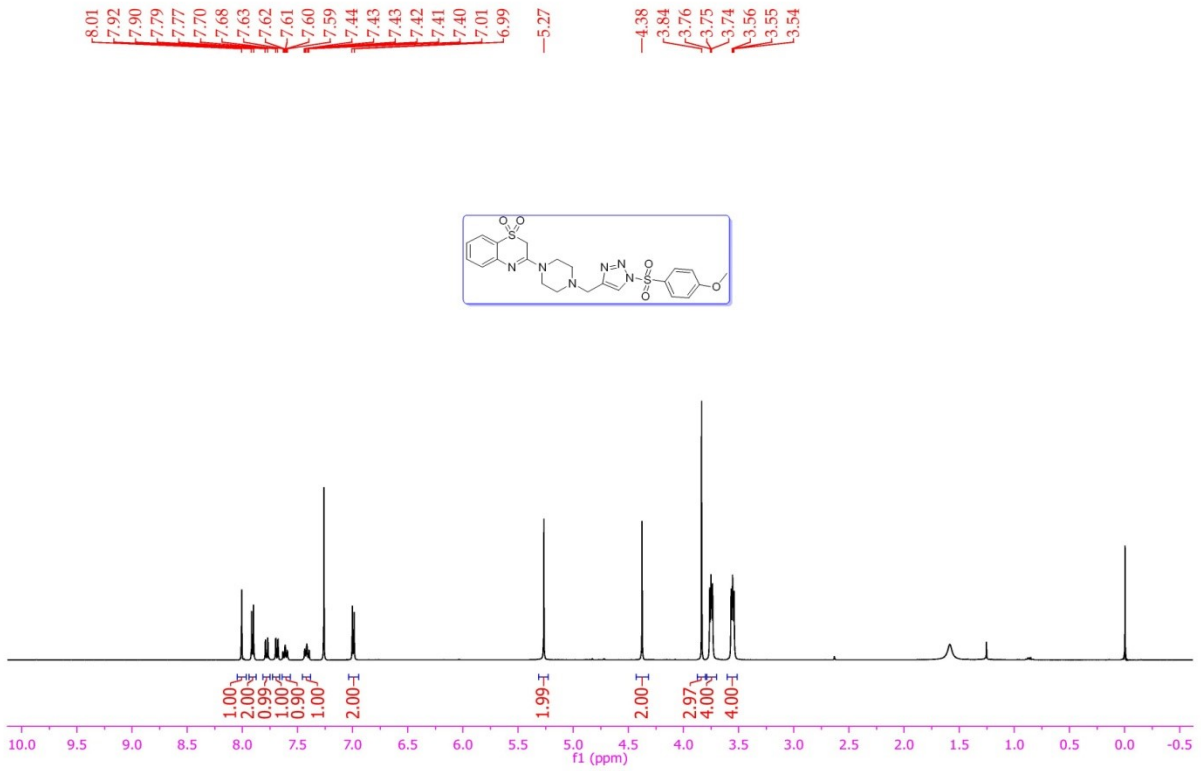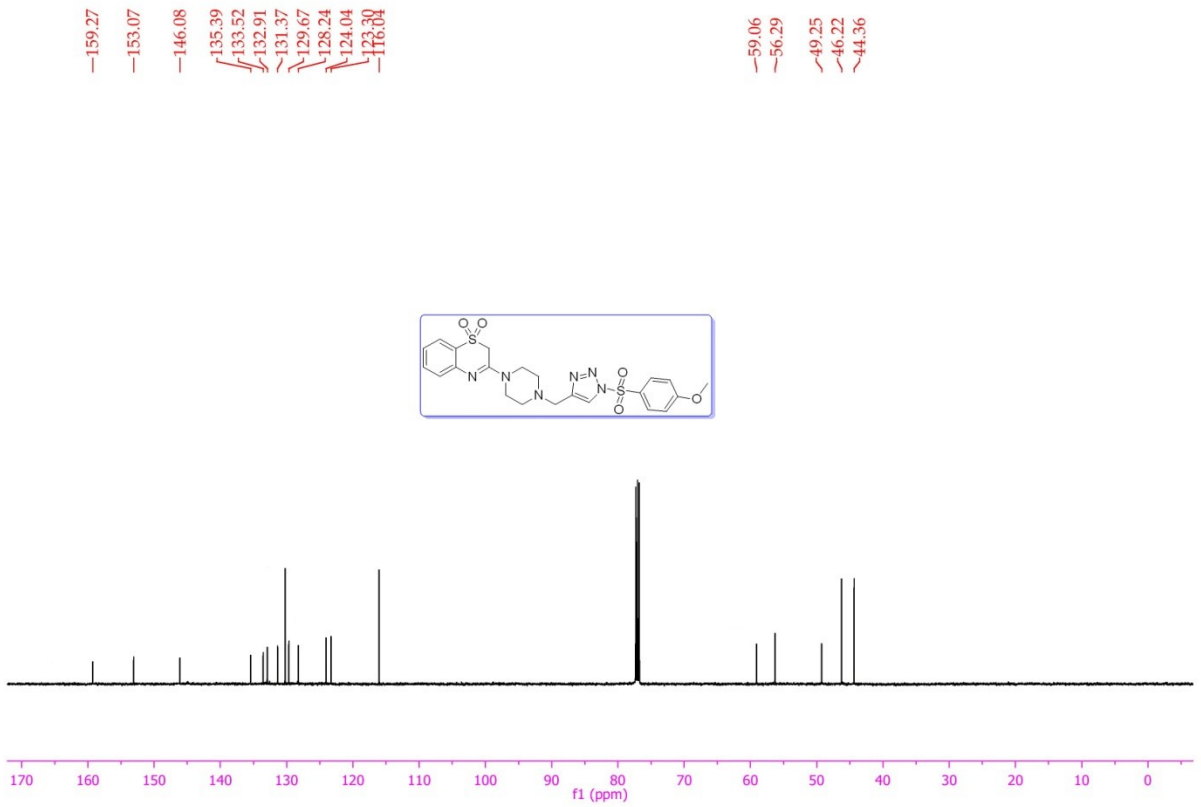



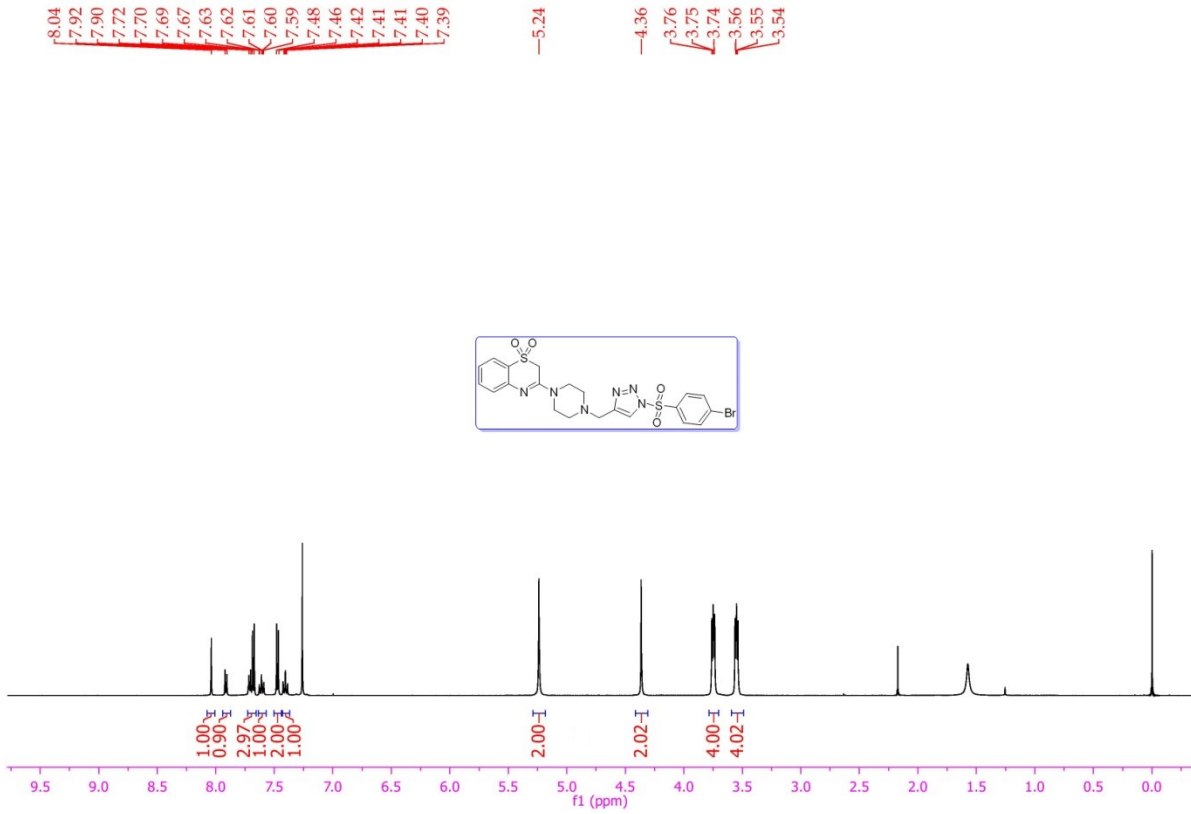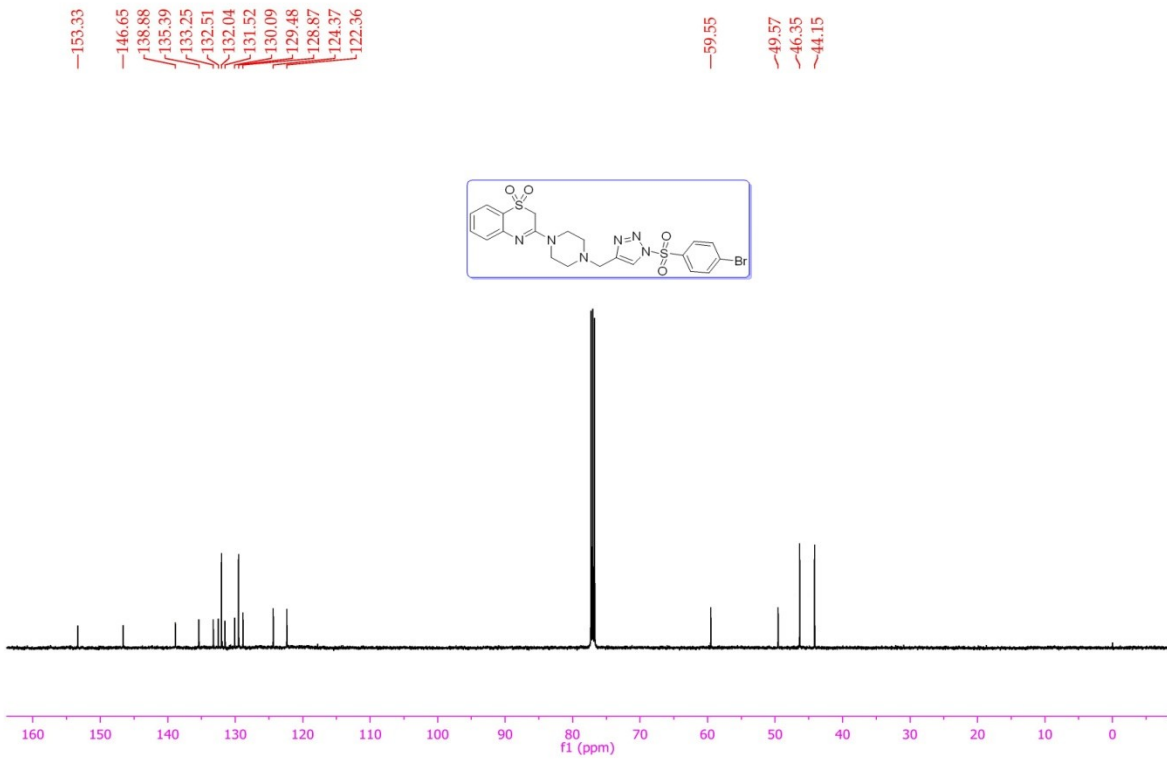

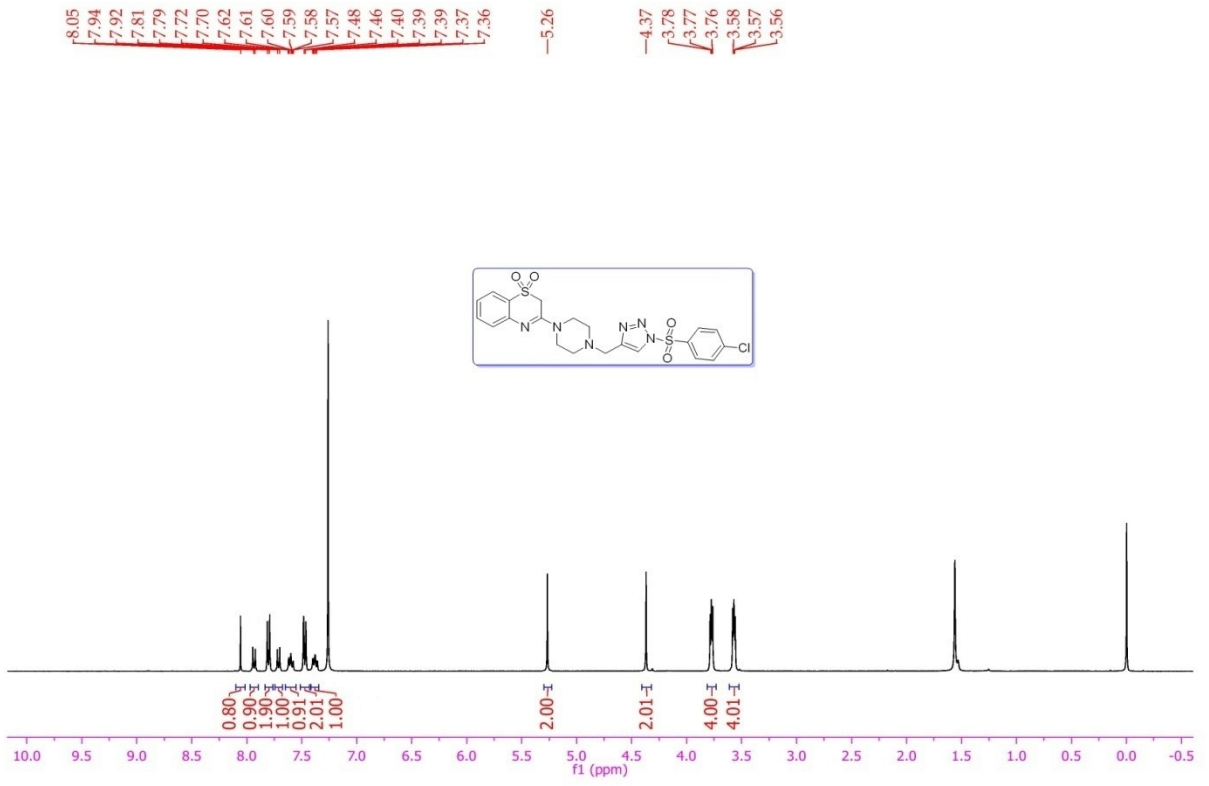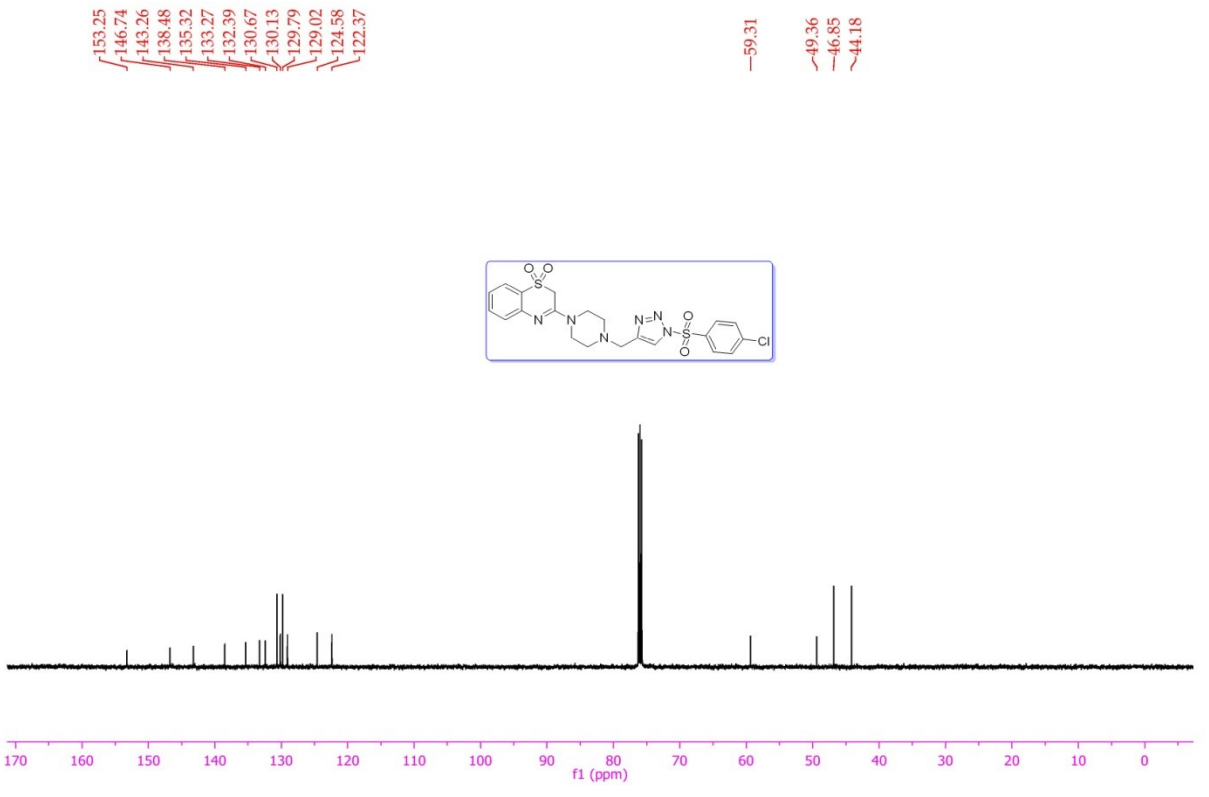

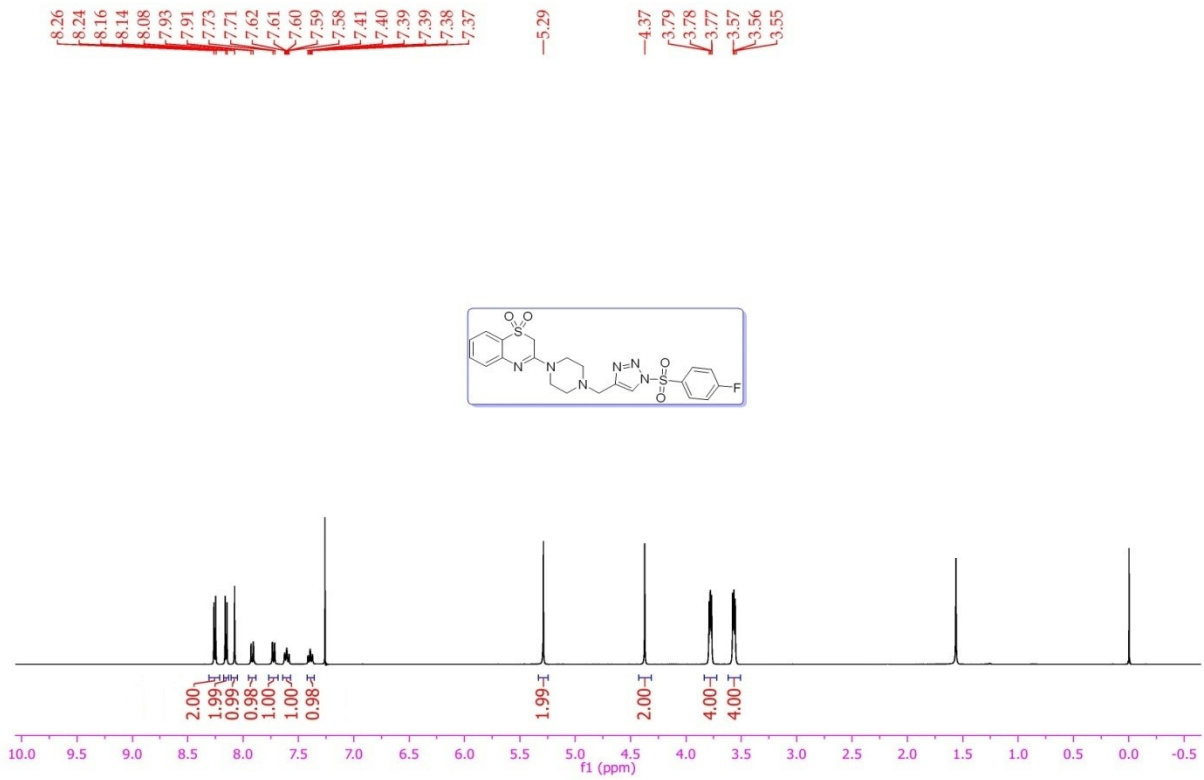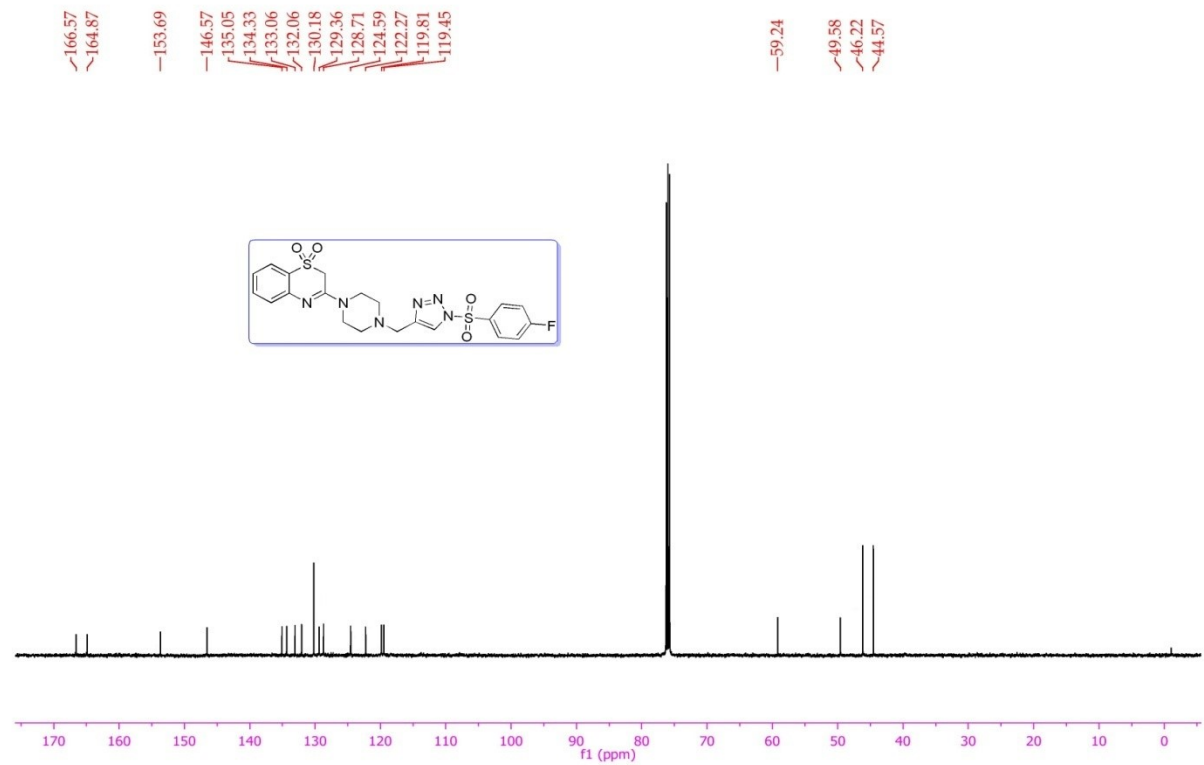

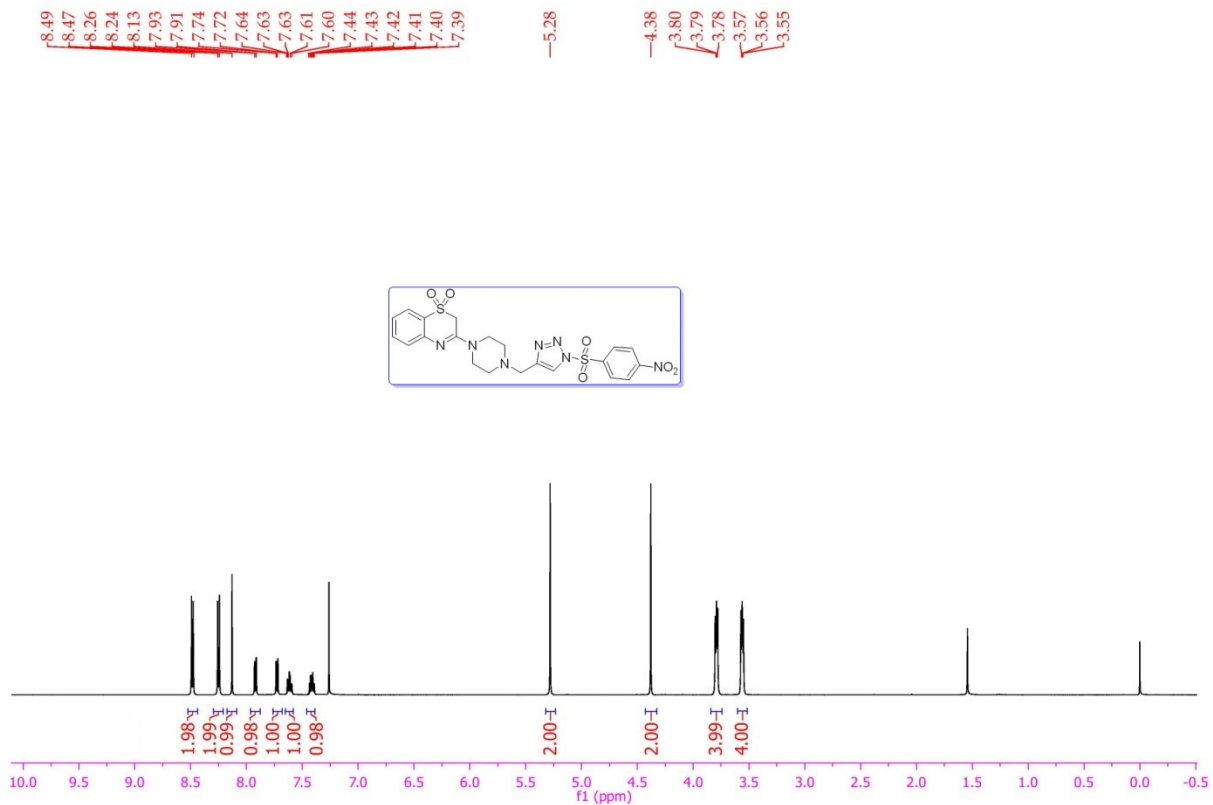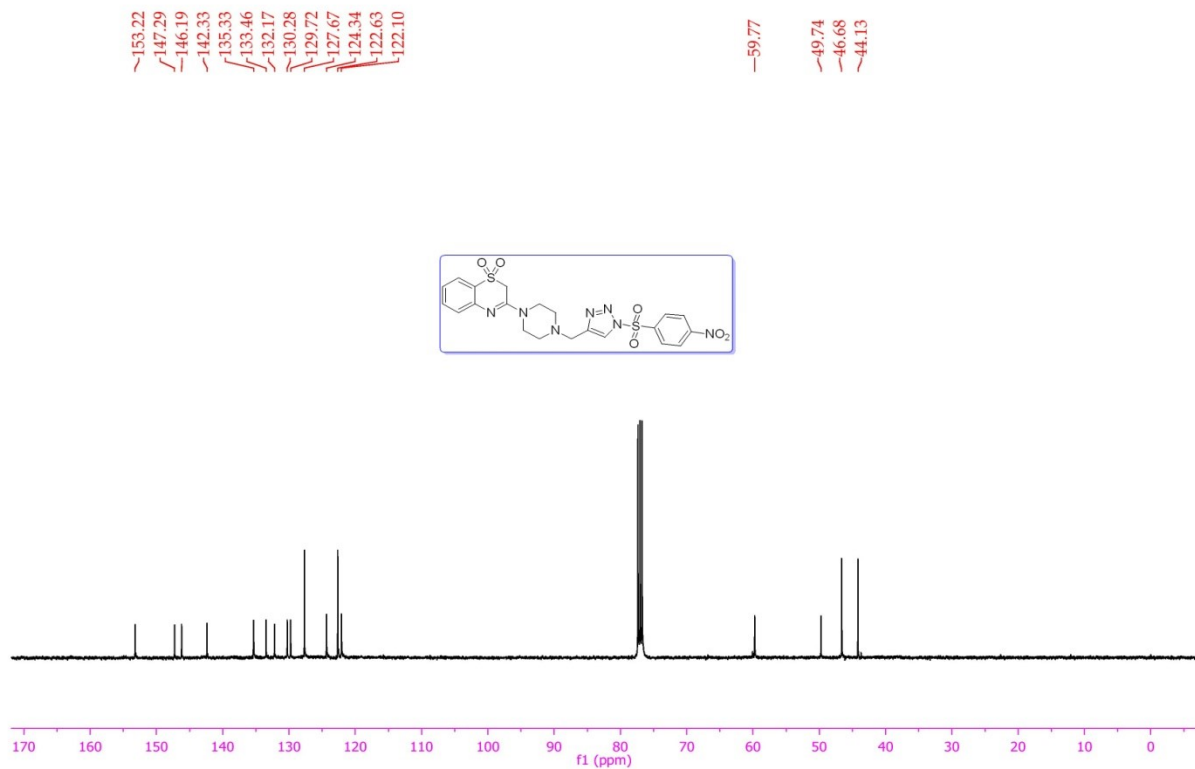

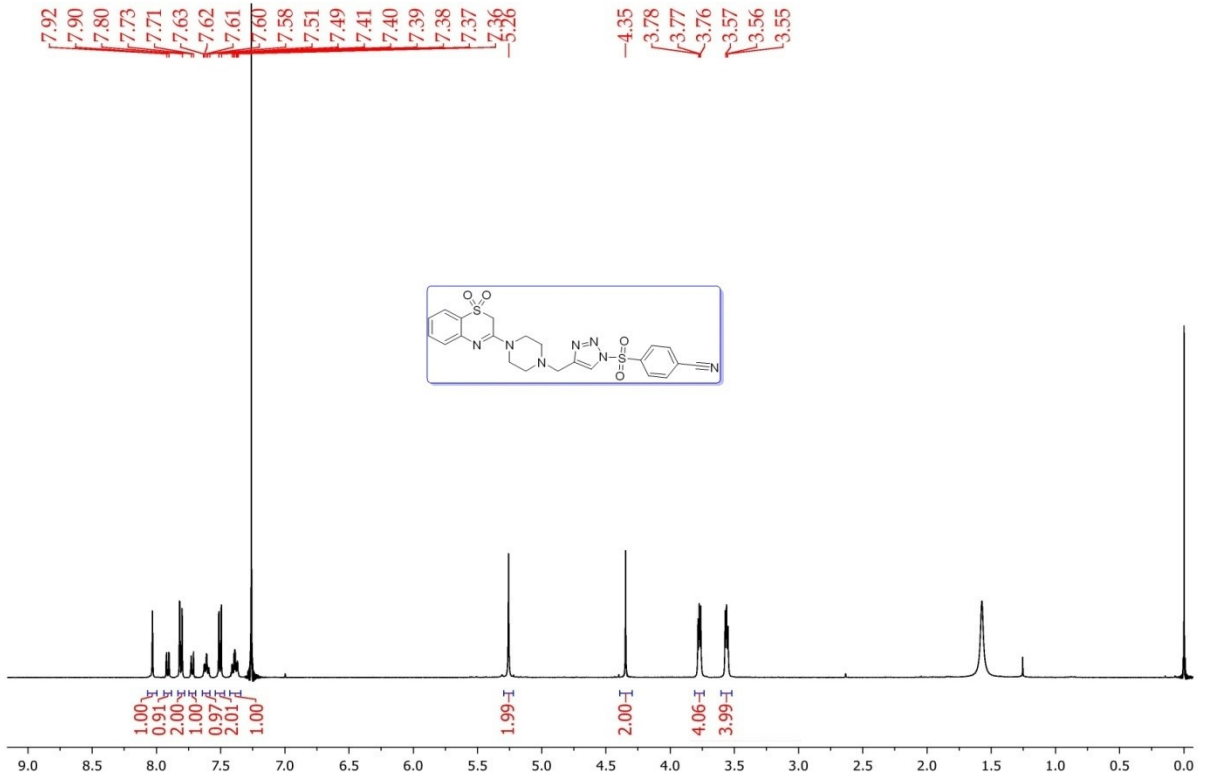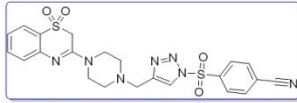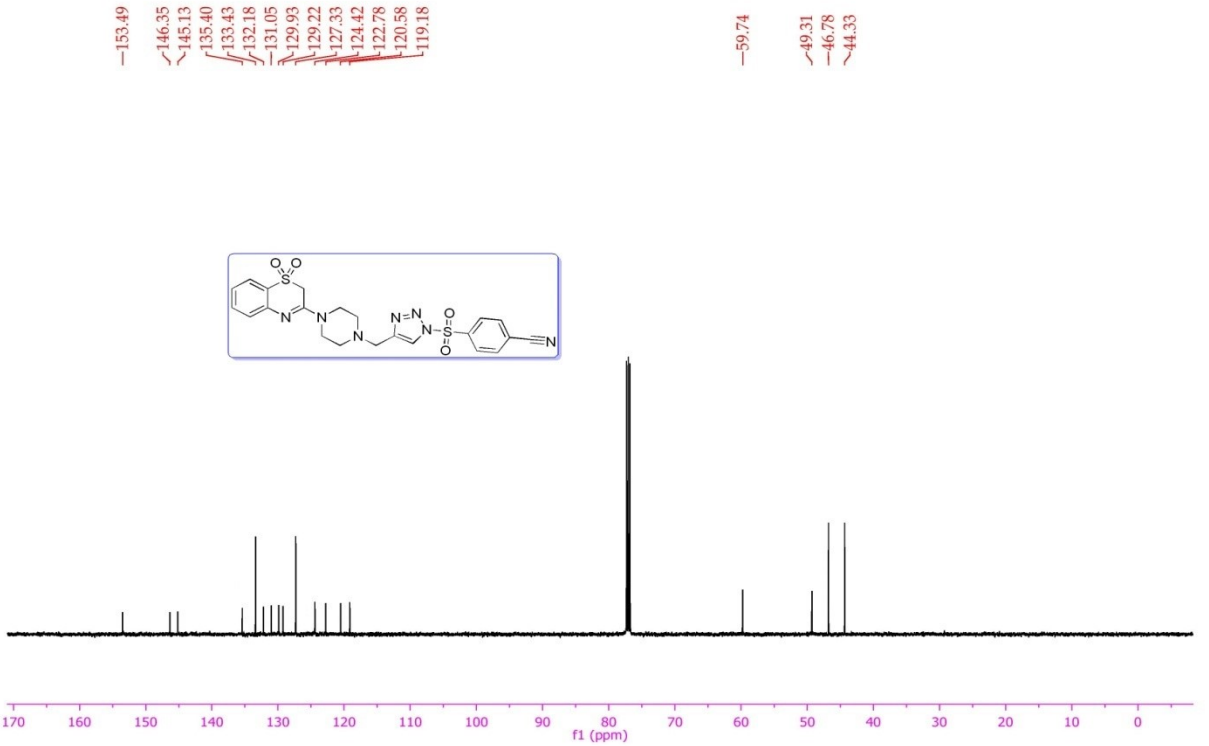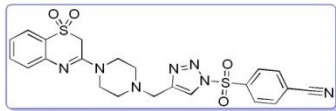

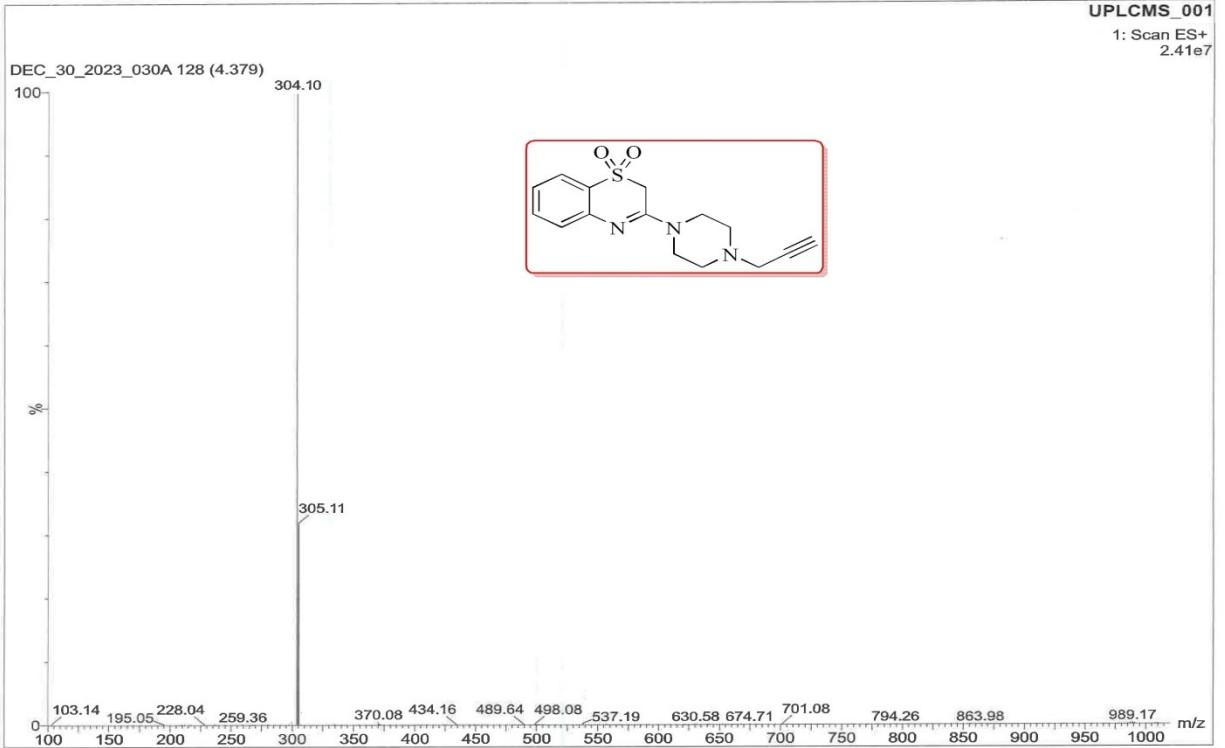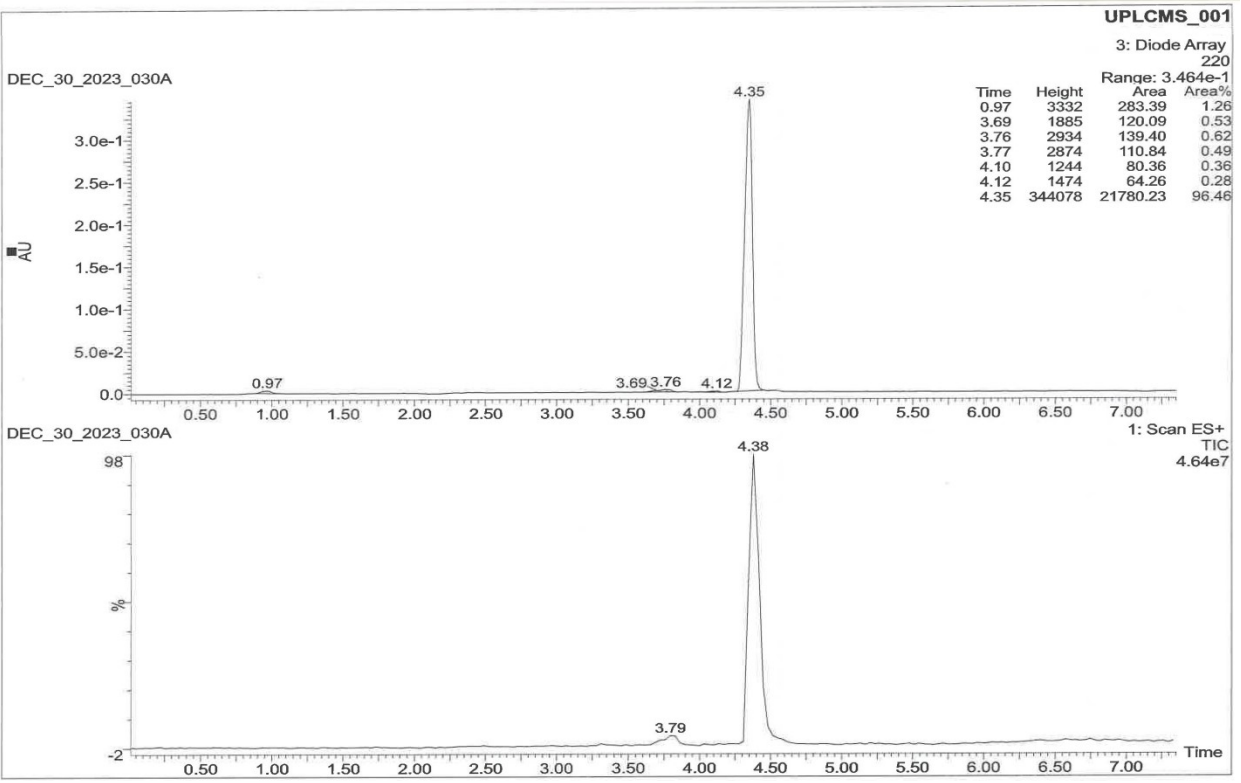

LCMS of compound 4

30122023\_06 +VE 16 (0.174) AM2 (Ar,22000.0,556.28,0.00,LS 10); Cm (16:22-79:126)

1: TOF MS ES+  
8.03e7

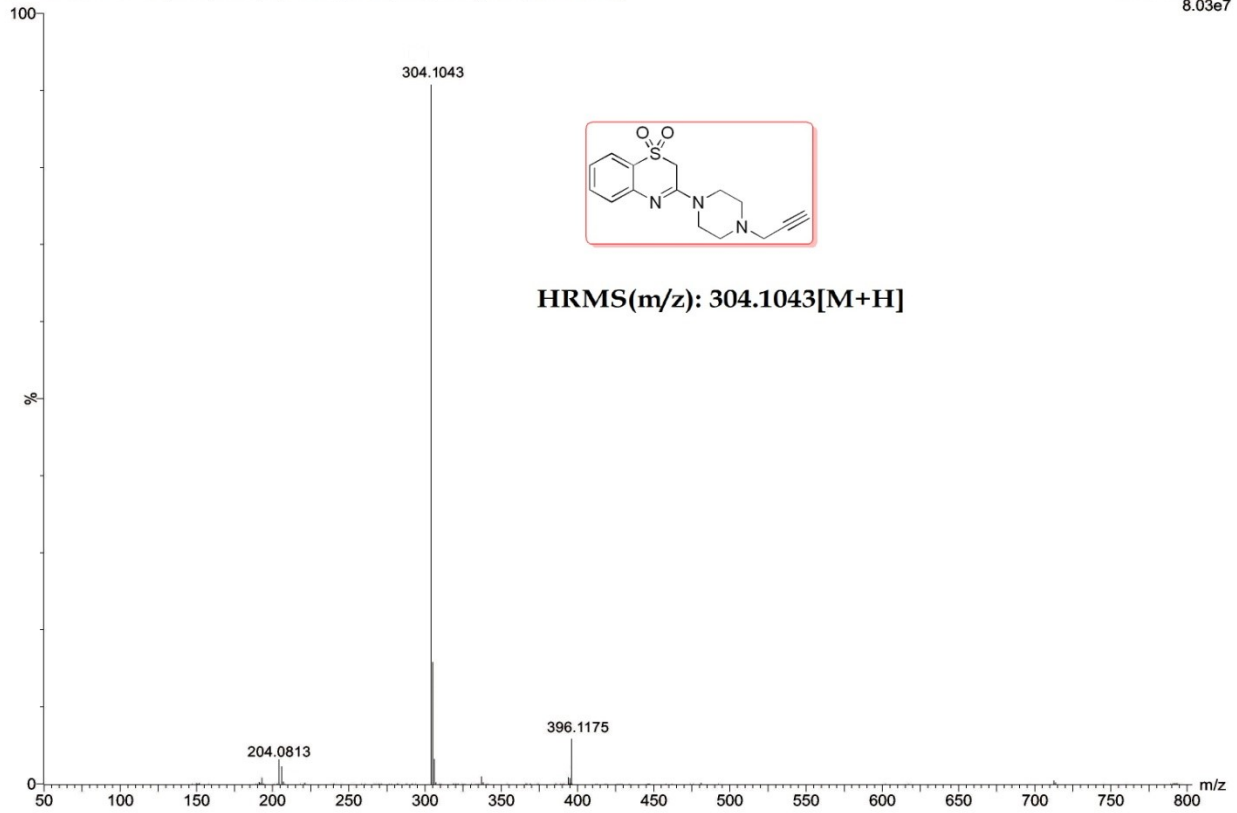

HRMS(m/z): 304.1043[M+H]

30122023\_09 +VE 28 (0.286) AM2 (Ar,22000.0,556.28,0.00,LS 10); Cm (28:36-79:126)

1: TOF MS ES+  
2.48e7

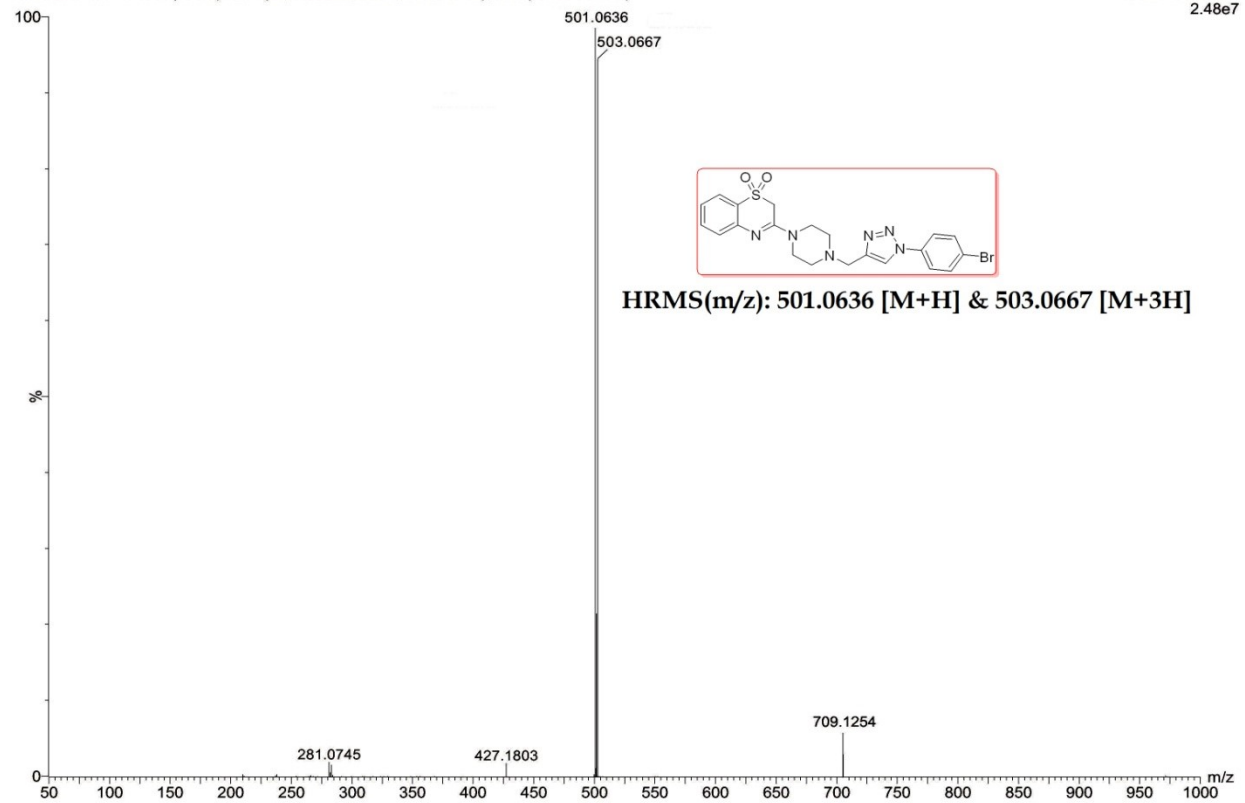

HRMS(m/z): 501.0636 [M+H] & 503.0667 [M+3H]

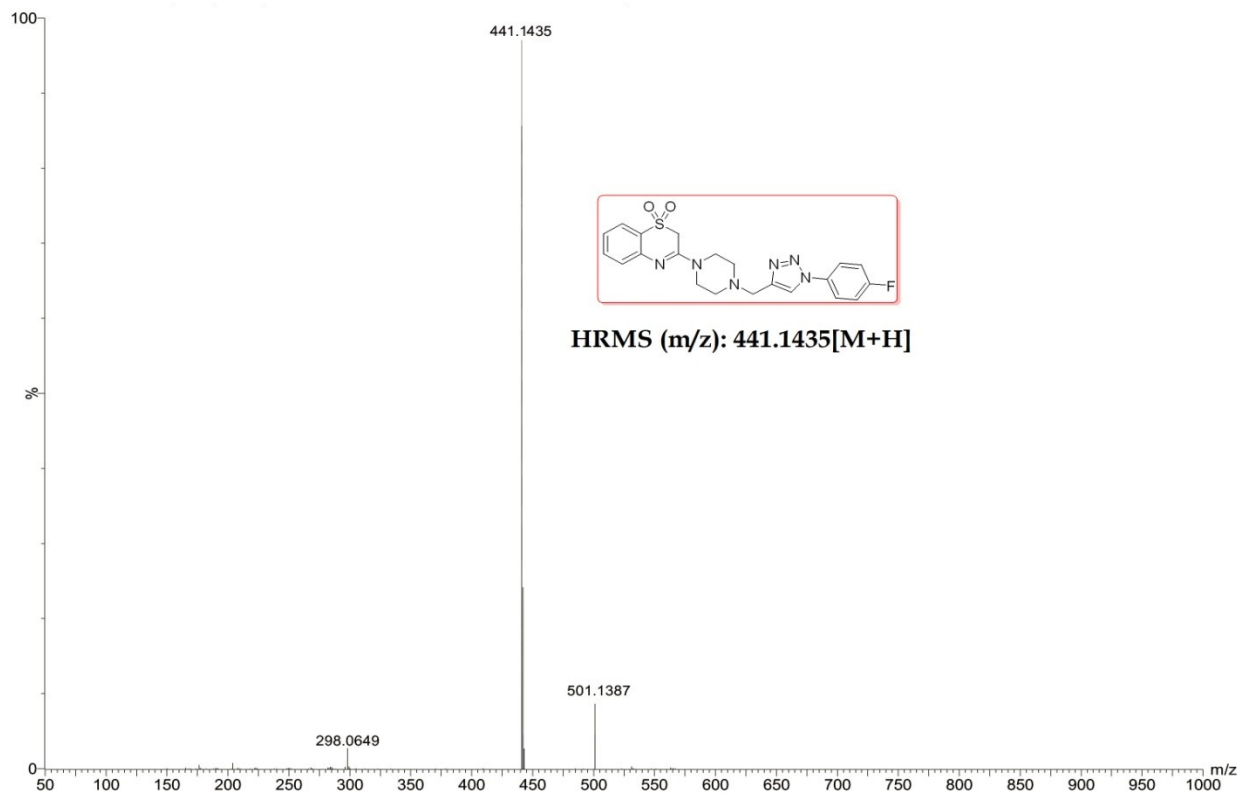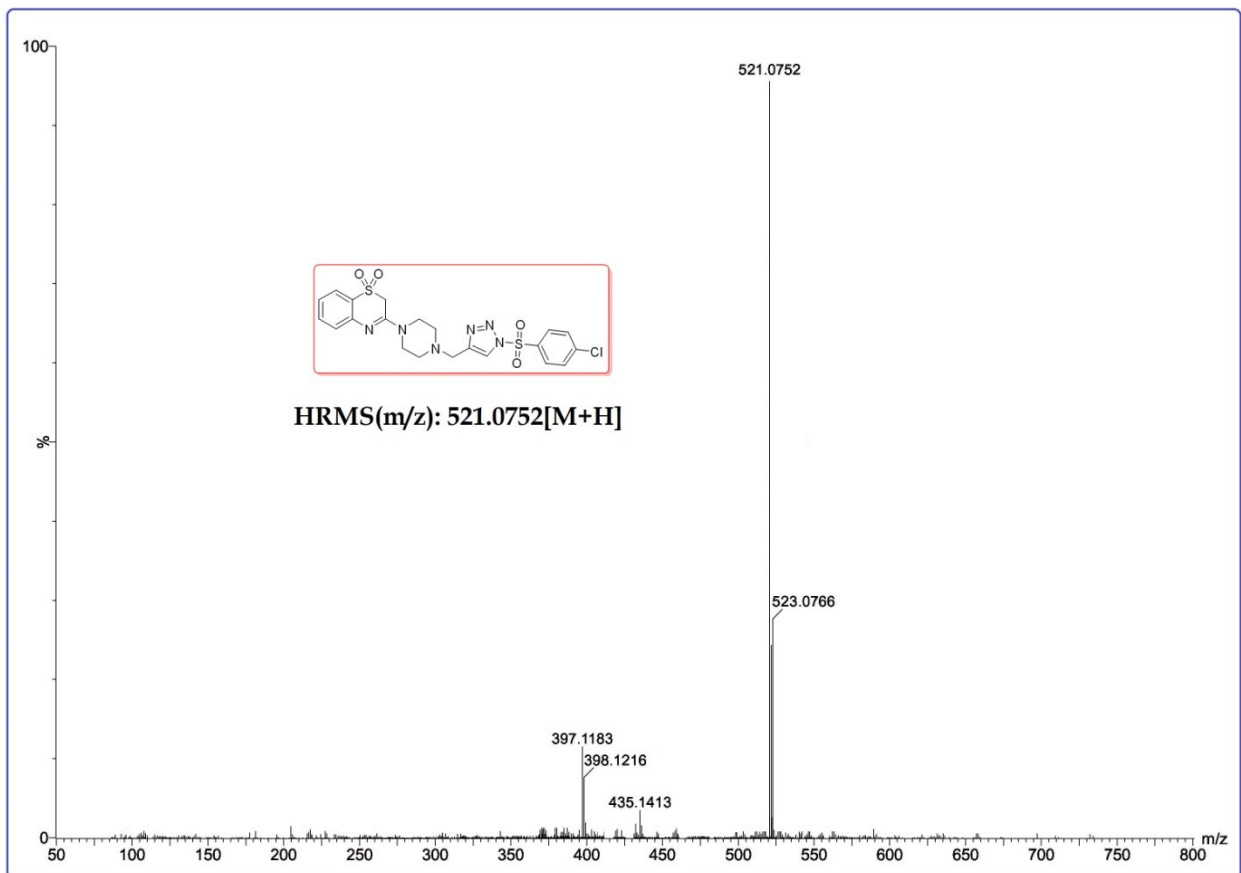



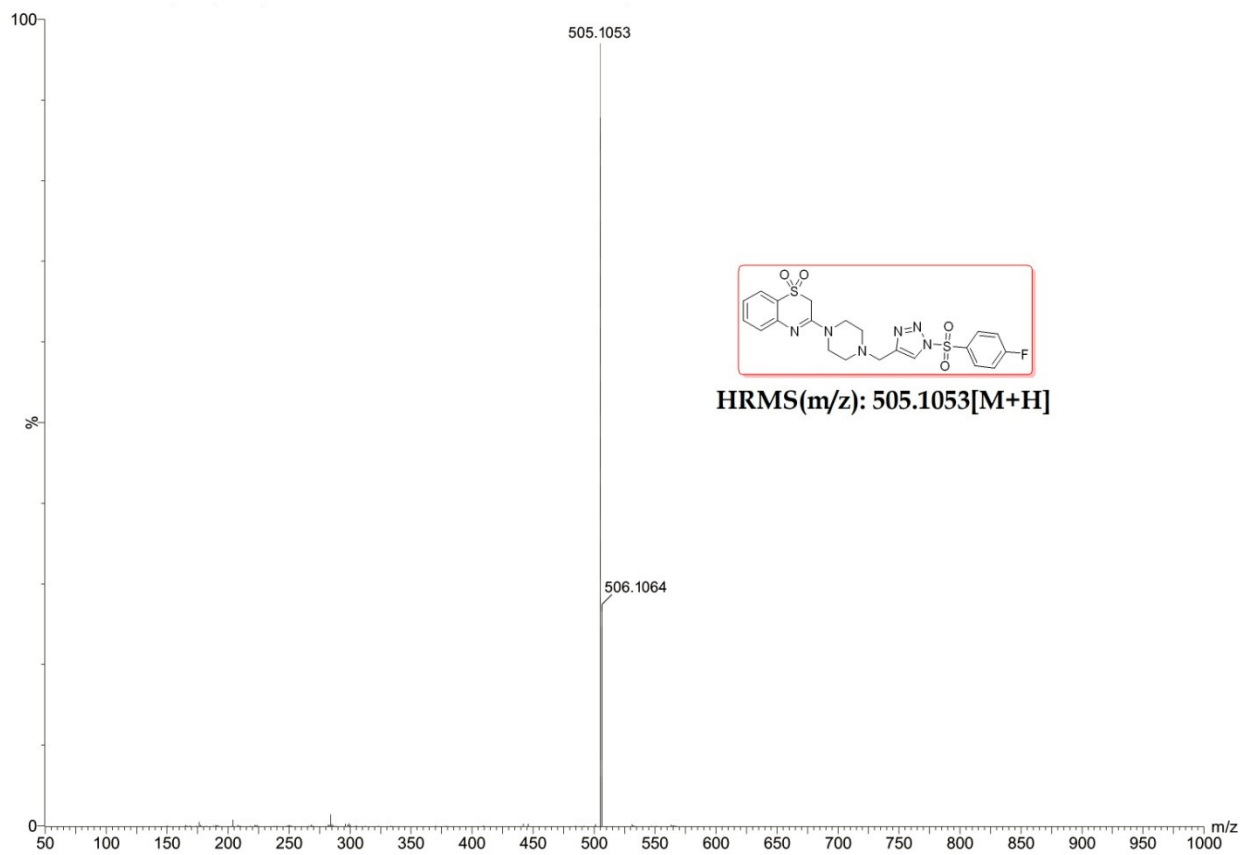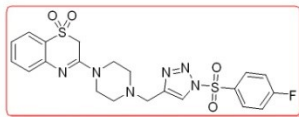

HRMS(m/z): 505.1053[M+H]
